# Supplementary material for: Development of novel therapeutics for the treatment of glaucoma based on actin-binding kinase inhibition – in silico approach
Source: Royal Society of Chemistry journal article supplement (doi:10.1039/c9nj05967a), 2020-01-01
Supplement: c9nj05967a1.pdf [file c9nj05967a1.pdf]

## Supplementary Information

Development of novel therapeutics for the treatment of glaucoma based on actin-binding kinases inhibition – *In silico* approach

Maja Zivkovic, Marko Zlatanovic, Nevena Zlatanovic, Jasmina Djordjevic Jovic, Mladjan Golubović, Aleksandar M. Veselinović

### Table of Content

|                     |    |
|---------------------|----|
| Table S1.....       | 1  |
| Table S2.....       | 3  |
| Table S3.....       | 6  |
| Table S4.....       | 11 |
| Figures S1-S16..... | 12 |

Table S1. The SMILES notation of the studied molecules, calculated values for the DCW, experimental data (Ac) – expr, the values of Ac calculated with the application of CORAL software – calc, the difference between expr and calc – diff for the built QSPR model

|    | SMILES notation                                                        | Ac(expr) | Split 1  |          |         |     | Split 2  |          |         |     | Split 3  |          |         |     |
|----|------------------------------------------------------------------------|----------|----------|----------|---------|-----|----------|----------|---------|-----|----------|----------|---------|-----|
|    |                                                                        |          | DCW      | Ac(calc) | Diff    | Set | DCW      | Ac(calc) | Diff    | Set | DCW      | Ac(calc) | Diff    | Set |
| 1  | <chem>O=C(C1CCN(CC1)c1ncnc2c1C(C)CN2)Nc1cccc1</chem>                   | 6.1      | 81.46787 | 5.7189   | 0.3811  | Tr  | 89.22062 | 5.7477   | 0.3523  | Tr  | 131.537  | 6.0333   | 0.0667  | Tr  |
| 2  | <chem>Cc1cccc1NC(=O)C1CCN(CC1)c1ncnc2[NH]cc(C)c12</chem>               | 4.94     | 79.64905 | 5.6277   | -0.6877 | Tr  | 87.48562 | 5.6533   | -0.7133 | Tr  | 117.7608 | 5.2203   | -0.2803 | Ts  |
| 3  | <chem>Cc1cc(ccc1)NC(=O)C1CCN(CC1)c1ncnc2[NH]cc(C)c12</chem>            | 6.19     | 86.27193 | 5.9597   | 0.2303  | Tr  | 94.36155 | 6.0274   | 0.1626  | Tr  | 133.1602 | 6.1291   | 0.0609  | Tr  |
| 4  | <chem>Cc1ccc(cc1)NC(=O)C1CCN(CC1)c1ncnc2[NH]cc(C)c12</chem>            | 5.89     | 82.45998 | 5.7686   | 0.1214  | Tr  | 85.02449 | 5.5194   | 0.3706  | Tr  | 129.5334 | 5.9151   | -0.0251 | Tr  |
| 5  | <chem>COc1cccc(c1)NC(=O)C1CCN(CC1)c1ncnc2[NH]cc(C)c12</chem>           | 6.28     | 97.07177 | 6.501    | -0.221  | Tr  | 96.34988 | 6.1356   | 0.1444  | Tr  | 132.5929 | 6.0956   | 0.1844  | Tr  |
| 6  | <chem>COc1ccc(cc1)NC(=O)C1CCN(CC1)c1ncnc2[NH]cc(C)c12</chem>           | 5.82     | 90.13402 | 6.1532   | -0.3332 | Ts  | 96.00507 | 6.1168   | -0.2968 | Tr  | 131.9221 | 6.056    | -0.236  | Tr  |
| 7  | <chem>O=C(C1CCN(CC1)c1ncnc2c1C(C)CN2)Nc1cccc(c1)Oc1cccc1</chem>        | 7.19     | 107.6583 | 7.0316   | 0.1584  | Tr  | 112.3171 | 7.0044   | 0.1856  | Ts  | 153.3137 | 7.3185   | -0.1285 | Ts  |
| 8  | <chem>Brc1cccc(c1)NC(=O)C1CCN(CC1)c1ncnc2[NH]cc(C)c12</chem>           | 6.52     | 92.72994 | 6.2834   | 0.2366  | Tr  | 96.24135 | 6.1297   | 0.3903  | Tr  | 133.6192 | 6.1562   | 0.3638  | Tr  |
| 9  | <chem>O=C(Nc1cc(C)ccc1)N1CCN(CC1)c1ncnc2[NH]cc(C)c12</chem>            | 7.04     | 101.8741 | 6.7417   | 0.2983  | Tr  | 111.3363 | 6.951    | 0.089   | Ts  | 152.2328 | 7.2547   | -0.2147 | Ts  |
| 10 | <chem>O=C(Nc1cccc(OC)c1)N1CCN(CC1)c1ncnc2[NH]cc(C)c12</chem>           | 6.85     | 112.7968 | 7.2891   | -0.4391 | Tr  | 116.1335 | 7.212    | -0.362  | Tr  | 152.048  | 7.2438   | -0.3938 | Tr  |
| 11 | <chem>O=C(Nc1cccc(Br)c1)N1CCN(CC1)c1ncnc2[NH]cc(C)c12</chem>           | 7.42     | 111.8894 | 7.2436   | 0.1764  | Ts  | 114.9782 | 7.1492   | 0.2708  | Tr  | 149.5764 | 7.0979   | 0.3221  | Tr  |
| 12 | <chem>N#CN=C(N1CCN(CC1)c1ncnc2c1C(C)CN2)Nc1cccc(c1)Br</chem>           | 7.96     | 133.5689 | 8.3302   | -0.3702 | Tr  | 127.2402 | 7.8163   | 0.1437  | Ts  | 163.6078 | 7.926    | 0.034   | Tr  |
| 13 | <chem>O=C(Nc1cccc(Br)c1)N1CCN(CC1)c1ncnc2[NH]cc(C)c12</chem>           | 8.41     | 135.7538 | 8.4397   | -0.0297 | Tr  | 139.7067 | 8.4946   | -0.0846 | Tr  | 167.0904 | 8.1315   | 0.2785  | Ts  |
| 14 | <chem>N#CN=C(N1CCN(CC1)c1ncnc2c1C(C)CN2)Nc1cccc(c1)Br</chem>           | 9.05     | 144.0904 | 8.8576   | 0.1924  | Ts  | 148.6898 | 8.9834   | 0.0666  | Ts  | 179.9821 | 8.8923   | 0.1577  | Tr  |
| 15 | <chem>O=C(Nc1cccc(Br)c1)N1CCN(CC1)c1ncnc2[NH]cc(C)c12</chem>           | 7.43     | 135.7538 | 8.4397   | -1.0097 | Tr  | 139.7067 | 8.4946   | -1.0646 | Tr  | 167.0904 | 8.1315   | -0.7015 | Tr  |
| 16 | <chem>CC(C)C1CN(CCN1C(\Nc1cccc(Br)c1)=N\C#N)c1ncnc2[NH]cc(C)c21</chem> | 8.38     | 137.6286 | 8.5337   | -0.1537 | Ts  | 140.7712 | 8.5526   | -0.1726 | Tr  | 166.6068 | 8.103    | 0.277   | Tr  |
| 17 | <chem>CC1CNc2ncnc(N3CC(C)N(CC3C)C(\Nc3cccc(Br)c3)=N\C#N)c12</chem>     | 8.41     | 131.1188 | 8.2074   | 0.2026  | Ts  | 136.1218 | 8.2996   | 0.1104  | Tr  | 172.3749 | 8.4434   | -0.0334 | Tr  |
| 18 | <chem>CC1CN(CC(C)N1C(=O)Nc1cccc(Br)c1)c1ncnc2[NH]cc(C)c21</chem>       | 6.88     | 119.9478 | 7.6475   | -0.7675 | Tr  | 115.5754 | 7.1816   | -0.3016 | Tr  | 144.8783 | 6.8206   | 0.0594  | Tr  |
| 19 | <chem>Brc1cccc(c1)NC(=O)N1C2CCCC1CN(C2)c1ncnc2[NH]cc(C)c21</chem>      | 7.12     | 115.0208 | 7.4006   | -0.2806 | Tr  | 112.7196 | 7.0263   | 0.0937  | Tr  | 148.403  | 7.0287   | 0.0913  | Tr  |
| 20 | <chem>Brc1cccc(c1)NC(=O)N1CC2CCC1CN2c1ncnc2[NH]cc(C)c21</chem>         | 7.12     | 112.3692 | 7.2677   | -0.1477 | Tr  | 117.708  | 7.2977   | -0.1777 | Tr  | 152.3688 | 7.2627   | -0.1427 | Tr  |
| 21 | <chem>Cc1c[NH]c2ncnc(N3CC(C)N(CC3C)C(\Nc3cccc(Br)c3)=N\C#N)c12</chem>  | 8.09     | 128.8614 | 8.0943   | -0.0043 | Ts  | 132.2797 | 8.0905   | -0.0005 | Ts  | 167.7117 | 8.1682   | -0.0782 | Tr  |
| 22 | <chem>N#CN=C(N1CCN(CC1)c1ncnc2c1C(Cl)CN2)Nc1cccc(c1)Br</chem>          | 8.92     | 144.3075 | 8.8684   | 0.0516  | Ts  | 146.0148 | 8.8379   | 0.0821  | Tr  | 181.8458 | 9.0023   | -0.0823 | Tr  |
| 23 | <chem>Cc1cc2c([NH]1)ncnc2N1CC(C)N(CC1)C(\Nc1cccc(Br)c1)=N\C#N</chem>   | 8.38     | 135.5841 | 8.4312   | -0.0512 | Tr  | 140.3216 | 8.5281   | -0.1481 | Tr  | 174.9435 | 8.595    | -0.215  | Ts  |
| 24 | <chem>CS(=O)(=O)/N=C(\Nc1cccc1)N1CCN(CC1)c1ncnc2[NH]cc(C)c21</chem>    | 8.17     | 119.6083 | 7.6305   | 0.5395  | Tr  | 131.453  | 8.0455   | 0.1245  | Ts  | 163.2384 | 7.9042   | 0.2658  | Ts  |
| 25 | <chem>N#CN=C(N1CCN(CC1)c1ncnc2c1C(C)CN2)Nc1cccc(c1)Cl</chem>           | 8.8      | 137.6799 | 8.5363   | 0.2637  | Tr  | 145.3364 | 8.8009   | -0.0009 | Tr  | 182.5951 | 9.0465   | -0.2465 | Tr  |
| 26 | <chem>O=C(Nc1cccc(Cl)c1)N1CCN(CC1)c1ncnc2[NH]cc(C)c12</chem>           | 8.64     | 126.6156 | 7.9817   | 0.6583  | Tr  | 136.0721 | 8.2969   | 0.3431  | Ts  | 172.548  | 8.4536   | 0.1864  | Ts  |
| 27 | <chem>N#CN=C(N1CCN(CC1)c1ncnc2c1C(C)CN2)Nc1cccc(c1)F</chem>            | 8.74     | 139.5282 | 8.6289   | 0.1111  | Tr  | 145.3364 | 8.8009   | -0.0609 | Ts  | 174.088  | 8.5445   | 0.1955  | Ts  |
| 28 | <chem>N#CN=C(N1CCN(CC1)c1ncnc2c1C(C)CN2)Nc1ccc(c(c1)Br)F</chem>        | 8.82     | 147.6065 | 9.0338   | -0.2138 | Tr  | 145.5702 | 8.8137   | 0.0063  | Tr  | 176.8934 | 8.71     | 0.11    | Ts  |
| 29 | <chem>O=C(Nc1ccc(F)c(Br)c1)N1CCN(CC1)c1ncnc2[NH]c(C)cc12</chem>        | 8.49     | 140.0359 | 8.6543   | -0.1643 | Tr  | 137.0448 | 8.3498   | 0.1402  | Tr  | 176.4429 | 8.6834   | -0.1934 | Tr  |

|    |                                                                      |      |          |        |         |    |          |        |         |    |          |        |         |    |
|----|----------------------------------------------------------------------|------|----------|--------|---------|----|----------|--------|---------|----|----------|--------|---------|----|
| 30 | FC(F)F)c1cc(N/C(=N\C#N)N2CCN(CC2C)c2nnc3[NH]cc(C)c32)ccc1            | 8.72 | 139.4372 | 8.6243 | 0.0957  | Tr | 137.7191 | 8.3865 | 0.3335  | Tr | 172.2701 | 8.4372 | 0.2828  | Ts |
| 31 | N#CN=C(N1CCN(CC1C)c1nnc2c1C(C)CN2)Nc1cccc(c1)C#N                     | 8.92 | 146.6243 | 8.9846 | -0.0646 | Tr | 149.1078 | 9.0062 | -0.0862 | Tr | 179.7481 | 8.8785 | 0.0415  | Tr |
| 32 | CC(C)(C)c1cc(N/C(=N\C#N)N2CCN(CC2C)c2nnc3[NH]cc(C)c32)ccc1           | 8.96 | 147.4606 | 9.0265 | -0.0665 | Tr | 149.0787 | 9.0046 | -0.0446 | Tr | 181.4725 | 8.9803 | -0.0203 | Tr |
| 33 | O=C(Nc1cccc(OC(=O)N(C)C)c1)N1CCN(CC1C)c1nnc2[NH]cc(C)c12             | 8.92 | 134.8932 | 8.3966 | 0.5234  | Ts | 137.6691 | 8.3838 | 0.5362  | Tr | 173.8831 | 8.5324 | 0.3876  | Tr |
| 34 | CC(C)NC(=O)c1cc(N/C(=N\C#N)N2CCN(CC2C)c2nnc3[NH]cc(C)c32)ccc1        | 8.46 | 137.54   | 8.5293 | -0.0693 | Tr | 138.5752 | 8.4331 | 0.0269  | Tr | 176.0816 | 8.6621 | -0.2021 | Tr |
| 35 | O=C(Nc1cc(ccc1)C(=O)NC(C)C)N1CCN(CC1C)c1nnc2[NH]cc(C)c12             | 8.26 | 134.218  | 8.3628 | -0.1028 | Tr | 134.8113 | 8.2283 | 0.0317  | Tr | 170.2957 | 8.3207 | -0.0607 | Tr |
| 36 | OCCNC(=O)c1cc(N/C(=N\C#N)N2CCN(CC2C)c2nnc3[NH]cc(C)c32)ccc1          | 9.1  | 139.3641 | 8.6207 | 0.4793  | Tr | 143.8449 | 8.7198 | 0.3802  | Ts | 176.5981 | 8.6926 | 0.4074  | Tr |
| 37 | O=C(Nc1cc(ccc1)C(=O)NCCO)N1CCN(CC1C)c1nnc2[NH]cc(C)c12               | 8.52 | 134.8871 | 8.3963 | 0.1237  | Ts | 141.9671 | 8.6176 | -0.0976 | Tr | 172.2942 | 8.4386 | 0.0814  | Tr |
| 38 | O=C(Nc1cc(ccc1)C(=O)NC(CO)CO)N1CCN(CC1C)c1nnc2[NH]cc(C)c12           | 8.52 | 135.8172 | 8.4429 | 0.0771  | Ts | 140.4758 | 8.5365 | -0.0165 | Tr | 173.8169 | 8.5285 | -0.0085 | Tr |
| 39 | CN(C)CCNC(=O)c1cc(N/C(=N\C#N)N2CCN(CC2C)c2nnc3[NH]cc(C)c32)ccc1      | 8.47 | 137.0331 | 8.5038 | -0.0338 | Tr | 142.2287 | 8.6319 | -0.1619 | Tr | 179.5604 | 8.8674 | -0.3974 | Tr |
| 40 | CC(C)NS(=O)(=O)c1cccc(N/C(=N\C#N)N2CCN(CC2C)c2nnc3[NH]cc(C)c32)c1    | 8.77 | 142.5832 | 8.782  | -0.012  | Tr | 144.4885 | 8.7548 | 0.0152  | Tr | 174.671  | 8.5789 | 0.1911  | Tr |
| 41 | OCCNS(=O)(=O)c1cccc(N\C(=N\C#N)N2CCN(CC2C)c2nnc3[NH]cc(C)c32)c1      | 8.54 | 141.4753 | 8.7265 | -0.1865 | Tr | 143.3197 | 8.6912 | -0.1512 | Tr | 175.4298 | 8.6237 | -0.0837 | Tr |
| 42 | O=C(Nc1cccc(OC(=O)N(C)C)c1)N1CCN(CC1C)c1nnc2[NH]cc(C)c12             | 8.92 | 134.8932 | 8.3966 | 0.5234  | Tr | 137.6691 | 8.3838 | 0.5362  | Tr | 173.8831 | 8.5324 | 0.3876  | Tr |
| 43 | O=C(Nc1cccc(OC(=O)NC(C)C)c1)N1CCN(CC1C)c1nnc2[NH]cc(C)c12            | 8.26 | 138.7343 | 8.5891 | -0.3291 | Tr | 142.5679 | 8.6503 | -0.3903 | Ts | 175.4436 | 8.6245 | -0.3645 | Tr |
| 44 | O=C(Nc1cccc(OC)c1)N1CCN(CC1C)c1nnc2[NH]cc(C)c12                      | 8.57 | 136.6613 | 8.4852 | 0.0848  | Ts | 140.862  | 8.5575 | 0.0125  | Tr | 169.562  | 8.2774 | 0.2926  | Tr |
| 45 | O=C(Nc1cccc1)N1CCN(CC1C)c1nnc2[NH]cc(C)c12                           | 8.92 | 120.8906 | 7.6948 | 1.2252  | Tr | 130.6029 | 7.9993 | 0.9207  | Ts | 162.1893 | 7.8423 | 1.0777  | Tr |
| 46 | O=C(Cc1cccc1)N1CCN(CC1C)c1nnc2[NH]cc(C)c12                           | 6.18 | 110.1019 | 7.154  | -0.974  | Tr | 115.6736 | 7.187  | -1.007  | Tr | 148.0471 | 7.0077 | -0.8277 | Tr |
| 47 | O=C(Nc1cccc(OC(=O)N(C)C)c1)N1CCN(CC1C)c1nnc2[NH]cc(C)c12             | 8.92 | 134.8932 | 8.3966 | 0.5234  | Tr | 137.6691 | 8.3838 | 0.5362  | Tr | 173.8831 | 8.5324 | 0.3876  | Tr |
| 48 | O=C(Nc1cccc(OC(=O)N(C)C)c1)N1CCC(CC1)c1nnc2[NH]cc(C)c12              | 6.66 | 105.3901 | 6.9179 | -0.2579 | Tr | 110.864  | 6.9253 | -0.2653 | Tr | 149.1726 | 7.0741 | -0.4141 | Tr |
| 49 | O=C(Nc1cccc(OC(=O)N(C)C)c1)N1CCN(CC1C(C)C)c1nnc2[NH]cc(C)c12         | 7.59 | 131.5041 | 8.2267 | -0.6367 | Tr | 123.1351 | 7.593  | -0.003  | Tr | 166.0359 | 8.0693 | -0.4793 | Ts |
| 50 | CC(C)Oc1cccc(c1)NC(=O)C1CCN(CC1)c1nnc2[NH]cc(C)c12                   | 6.48 | 92.59698 | 6.2767 | 0.2033  | Tr | 102.3448 | 6.4618 | 0.0182  | Ts | 134.6986 | 6.2199 | 0.2601  | Tr |
| 51 | Clc1cccc(c1)NC(=O)C1(CCN(CC1)c1nnc2[NH]cc(C)c12)CC=C                 | 8.72 | 128.2389 | 8.0631 | 0.6569  | Tr | 138.1621 | 8.4106 | 0.3094  | Tr | 175.7928 | 8.6451 | 0.0749  | Tr |
| 52 | CC(C)(C)c1cc(ccc1)NC(=O)C1(C)CCN(CC1)c1nnc2[NH]cc(C)c12              | 8.5  | 129.3613 | 8.1193 | 0.3807  | Tr | 135.6743 | 8.2752 | 0.2248  | Ts | 172.2306 | 8.4349 | 0.0651  | Ts |
| 53 | CN(C)C(=O)Oc1cccc(c1)NC(=O)C1(CCN(CC1)c1nnc2[NH]cc(C)c12)CC=C        | 8.66 | 136.6331 | 8.4838 | 0.1762  | Ts | 140.365  | 8.5304 | 0.1296  | Ts | 173.076  | 8.4847 | 0.1753  | Tr |
| 54 | CN(C)C(=O)Oc1cccc(c1)NC(=O)C1(C)CCN(CC1)c1nnc2[NH]cc(C)c12           | 8.32 | 121.2495 | 7.7128 | 0.6072  | Tr | 123.1307 | 7.5927 | 0.7273  | Tr | 159.7439 | 7.6979 | 0.6221  | Ts |
| 55 | CN(C)C(=O)Oc1cccc(c1)NC(=O)C1(O)CCN(CC1)c1nnc2[NH]cc(C)c12           | 6.86 | 114.7349 | 7.3863 | -0.5263 | Tr | 118.9103 | 7.3631 | -0.5031 | Ts | 156.5331 | 7.5085 | -0.6485 | Tr |
| 56 | CN(C)C(=O)Oc1cccc(c1)NC(=O)C1(CCN(CC1)c1nnc2[NH]cc(C)c12)N(C)C       | 8.29 | 130.4024 | 8.1715 | 0.1185  | Ts | 132.2716 | 8.0901 | 0.1999  | Tr | 171.1649 | 8.372  | -0.082  | Tr |
| 57 | CN(C)C(=O)Oc1cccc(c1)NC(=O)C1(CCN(CC1)c1nnc2[NH]cc(C)c12)COCOC       | 8.57 | 139.0004 | 8.6025 | -0.0325 | Tr | 143.0826 | 8.6783 | -0.1083 | Tr | 172.7932 | 8.4681 | 0.1019  | Ts |
| 58 | CN(C)C(=O)Oc1cccc(c1)NC(=O)C1(CCN(CC1)c1nnc2[NH]cc(C)c12)Cc1ncc[NH]1 | 9    | 146.9379 | 9.0003 | -0.0003 | Ts | 149.4454 | 9.0245 | -0.0245 | Tr | 183.5368 | 9.1021 | -0.1021 | Tr |
| 59 | CN(C)C(=O)Oc1cccc(c1)NC(=O)C1(CCN(CC1)c1nnc2[NH]cc(C)c12)CCNC        | 8.14 | 137.19   | 8.5117 | -0.3717 | Ts | 140.2995 | 8.5269 | -0.3869 | Tr | 168.7283 | 8.2282 | -0.0882 | Ts |
| 60 | CN(C)C(=O)Oc1cccc(c1)NC(=O)C1(CCN(CC1)c1nnc2[NH]cc(C)c12)CN          | 8.37 | 134.7533 | 8.3896 | -0.0196 | Tr | 132.1605 | 8.084  | 0.286   | Tr | 171.7738 | 8.4079 | -0.0379 | Tr |

Table S2. The example of DCW(2,15) calculation

| 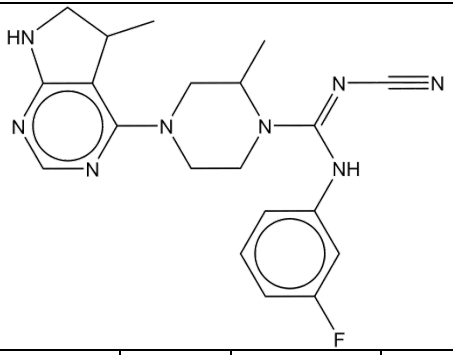 |                      |                 |                      | SMILES notation:<br><chem>N#C/N=C(/N1CCN(CC1C)c1ncnc2c1C(C)CN2)\Nc1cccc(c1)F</chem><br>DCW = 170.86417<br>pIC <sub>50</sub> (calc.) = 8.3542 |                      |                 |                      |                 |                      |
|-----------------------------------------------------------------------------------|----------------------|-----------------|----------------------|----------------------------------------------------------------------------------------------------------------------------------------------|----------------------|-----------------|----------------------|-----------------|----------------------|
| SA <sub>k</sub>                                                                   | CW(SA <sub>k</sub> ) | SA <sub>k</sub> | CW(SA <sub>k</sub> ) | SA <sub>k</sub>                                                                                                                              | CW(SA <sub>k</sub> ) | SA <sub>k</sub> | CW(SA <sub>k</sub> ) | SA <sub>k</sub> | CW(SA <sub>k</sub> ) |
| EC0-N...1...                                                                      | 0.0286               | PT4-N...9...    | 0.2243               | P2E0C...1-..                                                                                                                                 | 0.2059               | S2E0C...2-..    | 0.3083               | F.....          | 0                    |
| EC0-C...2...                                                                      | 0.1576               | PT4-N...7...    | 0.0429               | P2E0N...1-..                                                                                                                                 | 0.3356               | S2E0C...5-..    | 0.3441               | N...#.....      | 0.1221               |
| EC0-N...2...                                                                      | 0.6214               | PT4-C...9...    | 0.074                | P2E0C...2-..                                                                                                                                 | 0.2071               | S2E0F...3-..    | 0                    | C...#.....      | 0.2617               |
| EC0-C...3...                                                                      | 0.2223               | PT4-C...3...    | 0.1736               | P2E0C...0-..                                                                                                                                 | 0.2438               | S3E0N...2-..    | 1.9129               | N...C.....      | -0.7731              |
| EC0-N...3...                                                                      | 0.0789               | PT4-C...8...    | 0.2646               | P2E0C...1-..                                                                                                                                 | 0.2059               | S3E0C...3-..    | 0.472                | N...=.....      | 6.1748               |
| EC0-C...2...                                                                      | 0.1576               | PT4-C...2...    | 2.3543               | P2E0C...2-..                                                                                                                                 | 0.2071               | S3E0N...6-..    | 0.1568               | C...=.....      | 1.6108               |
| EC0-C...2...                                                                      | 0.1576               | PT4-C...5...    | 0.3547               | P2E0N...1-..                                                                                                                                 | 0.3356               | S3E0C...7-..    | 0.1042               | C...(.....      | 0.4483               |
| EC0-N...3...                                                                      | 0.0789               | PT4-C...3...    | 0.1736               | P2E0C...0-..                                                                                                                                 | 0.2438               | S3E0N...8-..    | 0.126                | N...(.....      | 0.3334               |
| EC0-C...2...                                                                      | 0.1576               | PT4-F...2...    | 0                    | P2E0N...1-..                                                                                                                                 | 0.3356               | S3E0C...10-     | 0.1914               | N...1.....      | 0.5162               |
| EC0-C...3...                                                                      | 0.2223               | VS2-N...2...    | -3.4674              | P2E0C...1-..                                                                                                                                 | 0.2059               | S3E0C...12-     | -0.623               | C...1.....      | 0.1841               |
| EC0-C...1...                                                                      | 0.3861               | VS2-C...3...    | 0.4143               | P2E0C...3-..                                                                                                                                 | -4.7956              | S3E0N...12-     | 2.2406               | C...C.....      | 0.282                |
| EC0-C...3...                                                                      | 0.2223               | VS2-N...6...    | 0.1379               | P2E0C...0-..                                                                                                                                 | 0.2438               | S3E0C...10-     | 0.1914               | N...C.....      | -0.7731              |
| EC0-N...2...                                                                      | 0.6214               | VS2-C...10..    | 0.1316               | P2E0C...1-..                                                                                                                                 | 0.2059               | S3E0C...8-..    | -0.2491              | N...(.....      | 0.3334               |
| EC0-C...2...                                                                      | 0.1576               | VS2-N...9...    | 0.335                | P2E0C...1-..                                                                                                                                 | 0.2059               | S3E0C...7-..    | 0.1042               | C...(.....      | 0.4483               |
| EC0-N...2...                                                                      | 0.6214               | VS2-C...9...    | 0.1363               | P2E0N...1-..                                                                                                                                 | 0.3356               | S3E0C...11-     | 0.1816               | C...C.....      | 0.282                |
| EC0-C...3...                                                                      | 0.2223               | VS2-C...8...    | 0.4188               | P2E0N...2-..                                                                                                                                 | 2.2812               | S3E0N...11-     | 0.1768               | C...1.....      | 0.1841               |
| EC0-C...3...                                                                      | 0.2223               | VS2-N...10..    | 0.4177               | P2E0C...0-..                                                                                                                                 | 0.2438               | S3E0C...9-..    | 0.1102               | C...1.....      | 0.1841               |
| EC0-C...3...                                                                      | 0.2223               | VS2-C...9...    | 0.1363               | P2E0C...1-..                                                                                                                                 | 0.2059               | S3E0N...9-..    | 0.3945               | C...(.....      | 0.4483               |
| EC0-C...1...                                                                      | 0.3861               | VS2-C...8...    | 0.4188               | P2E0C...0-..                                                                                                                                 | 0.2438               | S3E0C...10-     | 0.1914               | c...(.....      | 0.0022               |
| EC0-C...2...                                                                      | 0.1576               | VS2-C...5...    | 0.4156               | P2E0C...1-..                                                                                                                                 | 0.2059               | S3E0C...9-..    | 0.1102               | c...1.....      | 0.3779               |
| EC0-N...2...                                                                      | 0.6214               | VS2-C...12..    | 0.194                | P2E0C...1-..                                                                                                                                 | 0.2059               | S3E0C...9-..    | 0.1102               | n...1.....      | 0.4603               |
| EC0-N...2...                                                                      | 0.6214               | VS2-N...8...    | 0.5662               | P2E0C...2-..                                                                                                                                 | 0.2071               | S3E0C...7-..    | 0.1042               | n...c.....      | 0.2834               |
| EC0-C...3...                                                                      | 0.2223               | VS2-C...6...    | 0.0278               | P2E0F...1-..                                                                                                                                 | 0                    | S3E0C...9-..    | 0.1102               | n...c.....      | 0.2834               |
| EC0-C...2...                                                                      | 0.1576               | VS2-N...7...    | -0.897               | P3E0N...0-..                                                                                                                                 | 0.3707               | S3E0N...10-     | -1.3748              | n...c.....      | 0.2834               |
| EC0-C...2...                                                                      | 0.1576               | VS2-C...10..    | 0.1316               | P3E0C...0-..                                                                                                                                 | -0.0974              | S3E0N...10-     | -1.3748              | c...2.....      | 0.3801               |
| EC0-C...2...                                                                      | 0.1576               | VS2-C...12..    | 0.194                | P3E0N...1-..                                                                                                                                 | -0.5303              | S3E0C...7-..    | 0.1042               | c...2.....      | 0.3801               |
| EC0-C...3...                                                                      | 0.2223               | VS2-C...8...    | 0.4188               | P3E0C...3-..                                                                                                                                 | 0.0367               | S3E0C...7-..    | 0.1042               | c...1.....      | 0.3779               |
| EC0-C...2...                                                                      | 0.1576               | VS2-C...5...    | 0.4156               | P3E0N...1-..                                                                                                                                 | -0.5303              | S3E0C...5-..    | 0.3855               | C...1.....      | 0.1841               |
| EC0-F...1...                                                                      | 0                    | VS2-C...7...    | -0.4546              | P3E0C...4-..                                                                                                                                 | 0.0155               | S3E0C...4-..    | 0.2324               | C...(.....      | 0.4483               |
| PT2-N...1...                                                                      | 0.36                 | VS2-N...8...    | 0.5662               | P3E0C...3-..                                                                                                                                 | 0.0367               | S3E0C...3-..    | 0.472                | C...(.....      | 0.4483               |
| PT2-C...1...                                                                      | 0.2704               | VS2-N...9...    | 0.335                | P3E0N...3-..                                                                                                                                 | 0.1673               | S3E0C...5-..    | 0.3855               | C...(.....      | 0.4483               |
| PT2-N...3...                                                                      | 0.0188               | VS2-C...8...    | 0.4188               | P3E0C...3-..                                                                                                                                 | 0.0367               | S3E0F...4-..    | 0                    | C...(.....      | 0.4483               |
| PT2-C...4...                                                                      | 0.2017               | VS2-C...6...    | 0.0278               | P3E0C...2-..                                                                                                                                 | 0.0255               | NNE0N...109-    | 0.0205               | N...C.....      | -0.7731              |
| PT2-N...5...                                                                      | 0.3753               | VS2-C...6...    | 0.0278               | P3E0C...2-..                                                                                                                                 | 0.0255               | NNE0C...200-    | -2.1176              | N...2.....      | 0.3576               |
| PT2-C...3...                                                                      | 0.0896               | VS2-C...5...    | 0.4156               | P3E0C...4-..                                                                                                                                 | 0.0155               | NNE0N...218-    | 0.193                | 2...(.....      | 4.1134               |
| PT2-C...3...                                                                      | 0.0896               | VS2-C...5...    | 0.4156               | P3E0N...3-..                                                                                                                                 | 0.1673               | NNE0C...300-    | 0.3838               | N...(.....      | 0.3334               |

|              |         |               |         |               |         |              |         |              |         |
|--------------|---------|---------------|---------|---------------|---------|--------------|---------|--------------|---------|
| PT2-N...4... | -0.4989 | VS2-C...7...  | -0.4546 | P3E0C...2-..  | 0.0255  | NNE0N...327- | 0.4929  | c...N.....   | 0.467   |
| PT2-C...4... | 0.2017  | VS2-F...4...  | 0       | P3E0N...2-..  | 0.4778  | NNE0C...209- | 0.0137  | c...1.....   | 0.3779  |
| PT2-C...3... | 0.0896  | VS3-N...3...  | -3.1771 | P3E0C...3-..  | 0.0367  | NNE0C...209- | 0.0137  | c...1.....   | 0.3779  |
| PT2-C...2... | 0.3307  | VS3-C...5...  | 0.2796  | P3E0C...3-..  | 0.0367  | NNE0N...327- | 0.4929  | c...c.....   | 0.3238  |
| PT2-C...5... | 2.418   | VS3-N...8...  | 0.3274  | P3E0C...2-..  | 0.0255  | NNE0C...209- | 0.0137  | c...c.....   | 0.3238  |
| PT2-N...3... | 0.0188  | VS3-C...10... | 0.3796  | P3E0C...2-..  | 0.0255  | NNE0C...318- | 0.2633  | c...c.....   | 0.3238  |
| PT2-C...2... | 0.3307  | VS3-N...11..  | 0.2381  | P3E0C...2-..  | 0.0255  | NNE0C...109- | 0.0792  | c...(.....   | 0.0022  |
| PT2-N...3... | 0.0188  | VS3-C...12..  | -0.1151 | P3E0N...3-..  | 0.1673  | NNE0C...309- | -0.0699 | c...(.....   | 0.0022  |
| PT2-C...4... | 0.2017  | VS3-C...14..  | 0.2175  | P3E0N...3-..  | 0.1673  | NNE0N...218- | 0.193   | c...1.....   | 0.3779  |
| PT2-C...6... | -1.0902 | VS3-N...15..  | 0.0911  | P3E0C...2-..  | 0.0255  | NNE0C...200- | -2.1176 | 1...(.....   | 0.1365  |
| PT2-C...3... | 0.0896  | VS3-C...12..  | -0.1151 | P3E0C...1-..  | 0.2185  | NNE0N...218- | 0.193   | F...(.....   | 0       |
| PT2-C...2... | 0.3307  | VS3-C...11..  | 0.4426  | P3E0C...2-..  | 0.0255  | NNE0C...309- | -0.0699 | N...#...C... | 0.2243  |
| PT2-C...3... | 0.0896  | VS3-C...8...  | 0.2334  | P3E0C...0-..  | -0.0974 | NNE0C...327- | -0.2912 | N...C...#... | 2.006   |
| PT2-N...3... | 0.0188  | VS3-C...14..  | 0.2175  | P3E0C...0-..  | -0.0974 | NNE0C...327- | -0.2912 | C...N...=... | 0.6689  |
| PT2-N...4... | -0.4989 | VS3-N...13..  | -0.9967 | P3E0C...1-..  | 0.2185  | NNE0C...109- | 0.0792  | N...=...C... | 0.4845  |
| PT2-C...3... | 0.0896  | VS3-C...11..  | 0.4426  | P3E0F...1-..  | 0       | NNE0C...209- | 0.0137  | =...C...(... | 2.1771  |
| PT2-C...3... | 0.0896  | VS3-N...11..  | 0.2381  | P4E0N...0-..  | 0.0725  | NNE0N...218- | 0.193   | N...(C...    | 3.2423  |
| PT2-C...2... | 0.3307  | VS3-C...13..  | 0.185   | P4E0C...2-..  | 1.315   | NNE0N...218- | 0.193   | 1...N...(... | 0.3247  |
| PT2-C...3... | 0.0896  | VS3-C...12..  | -0.1151 | P4E0N...3-..  | 2.282   | NNE0C...318- | 0.2633  | N...1...C... | -5.1167 |
| PT2-C...2... | 0.3307  | VS3-C...12..  | -0.1151 | P4E0C...7-..  | 0.1755  | NNE0C...218- | 0.1389  | C...C...1... | 0.3636  |
| PT2-C...4... | 0.2017  | VS3-C...8...  | 0.2334  | P4E0N...1-..  | 0.0108  | NNE0C...218- | 0.1389  | N...C...C... | 0.3251  |
| PT2-F...2... | 0       | VS3-C...11..  | 0.4426  | P4E0C...10-.. | 0.4534  | NNE0C...218- | 0.1389  | C...N...(... | 0.2301  |
| PT3-N...1... | 0.1551  | VS3-N...12..  | -0.028  | P4E0C...7-..  | 0.1755  | NNE0C...318- | 0.2633  | N...(C...    | 3.2423  |
| PT3-C...2... | 0.1335  | VS3-N...12..  | -0.028  | P4E0N...7-..  | 0.2641  | NNE0C...218- | 0.1389  | C...C...(... | 0.452   |
| PT3-N...3... | 0.2728  | VS3-C...10... | 0.3796  | P4E0C...7-..  | 0.1755  | NNE0F...109- | 0       | C...C...1... | 0.3636  |
| PT3-C...6... | 1.4429  | VS3-C...9...  | 0.4197  | P4E0C...6-..  | 0.0656  | N.....       | 0.3653  | C...1...C... | 0.3798  |
| PT3-N...4... | 0.1858  | VS3-C...7...  | 0.2346  | P4E0C...4-..  | 0.0119  | #.....       | 0.4874  | 1...C...(... | 0.4776  |
| PT3-C...6... | 1.4429  | VS3-C...6...  | 0.218   | P4E0C...8-..  | 0.0041  | C.....       | 0.4163  | c...(C...    | 0.3025  |
| PT3-C...5... | -0.3344 | VS3-C...6...  | 0.218   | P4E0N...7-..  | 0.2641  | N.....       | 0.3653  | 1...c...(... | 0.0432  |
| PT3-N...6... | -0.5241 | VS3-C...7...  | 0.2346  | P4E0C...6-..  | 0.0656  | =.....       | 0.2201  | n...1...c... | -1.0069 |
| PT3-C...5... | -0.3344 | VS3-F...5...  | 0       | P4E0N...4-..  | 0.2159  | C.....       | 0.4163  | c...n...1... | -0.0704 |
| PT3-C...5... | -0.3344 | NNC-N...110.  | 0.3385  | P4E0C...7-..  | 0.1755  | (.....       | 0.4577  | n...c...n... | 6.9767  |
| PT3-C...3... | 0.1487  | NNC-C...202.  | -0.9498 | P4E0C...5-..  | 0.3162  | N.....       | 0.3653  | c...n...c... | 6.2806  |
| PT3-C...7... | 0.2217  | NNC-N...220.  | 0.1411  | P4E0C...6-..  | 0.0656  | 1.....       | 0.1317  | n...c...2... | -0.5959 |
| PT3-N...5... | 1.1435  | NNC-C...303.  | 0.2362  | P4E0C...4-..  | 0.0119  | C.....       | 0.4163  | c...2...c... | 0.4037  |
| PT3-C...4... | 0.2734  | NNC-N...330.  | 0.2638  | P4E0C...6-..  | 0.0656  | C.....       | 0.4163  | 2...c...1... | 0.6481  |
| PT3-N...4... | 0.1858  | NNC-C...211.  | 2.2033  | P4E0N...7-..  | 0.2641  | N.....       | 0.3653  | c...1...C... | 0.1437  |
| PT3-C...6... | 1.4429  | NNC-C...211.  | 2.2033  | P4E0N...5-..  | 0.0189  | (.....       | 0.4577  | 1...C...(... | 0.4776  |
| PT3-C...6... | 1.4429  | NNC-N...330.  | 0.2638  | P4E0C...6-..  | 0.0656  | C.....       | 0.4163  | C...(C...    | 0.264   |
| PT3-C...5... | -0.3344 | NNC-C...211.  | 2.2033  | P4E0C...1-..  | 0.358   | C.....       | 0.4163  | (...C...(... | -0.794  |
| PT3-C...3... | 0.1487  | NNC-C...321.  | 0.4714  | P4E0C...6-..  | 0.0656  | 1.....       | 0.1317  | C...(C...    | 0.264   |
| PT3-C...4... | 0.2734  | NNC-C...110.  | 0.3021  | P4E0C...0-..  | -0.9513 | C.....       | 0.4163  | N...C...(... | 0.282   |
| PT3-N...5... | 1.1435  | NNC-C...312.  | -0.184  | P4E0C...2-..  | 1.315   | (.....       | 0.4577  | C...N...2... | 0.0573  |
| PT3-N...5... | 1.1435  | NNC-N...220.  | 0.1411  | P4E0C...1-..  | 0.358   | c.....       | 0.3688  | N...2...(... | 2.0213  |
| PT3-C...5... | -0.3344 | NNC-C...202.  | -0.9498 | P4E0F...1-..  | 0       | 1.....       | 0.1317  | N...(2...    | -0.0831 |
| PT3-C...3... | 0.1487  | NNC-N...220.  | 0.1411  | S2E0N...1-..  | 0.3437  | n.....       | -0.056  | c...N...(... | 2.0713  |
| PT3-C...4... | 0.2734  | NNC-C...312.  | -0.184  | S2E0C...1-..  | 0.1063  | c.....       | 0.3688  | N...c...1... | 1.1702  |

|              |        |              |         |              |         |        |         |              |         |
|--------------|--------|--------------|---------|--------------|---------|--------|---------|--------------|---------|
| PT3-C...2... | 0.1335 | NNC-C...330. | 0.251   | S2E0N...4-.. | 0.1289  | n..... | -0.056  | c...1...c... | 0.4611  |
| PT3-C...3... | 0.1487 | NNC-C...330. | 0.251   | S2E0C...7-.. | 2.1705  | c..... | 0.3688  | c...c...1... | 0.1309  |
| PT3-C...3... | 0.1487 | NNC-C...110. | 0.3021  | S2E0N...6-.. | 0.1176  | 2..... | -0.9023 | c...c...c... | 0.1879  |
| PT3-F...2... | 0      | NNC-C...211. | 2.2033  | S2E0C...7-.. | 2.1705  | c..... | 0.3688  | c...c...c... | 0.1879  |
| PT4-N...1... | 0.0125 | NNC-N...220. | 0.1411  | S2E0C...6-.. | -0.87   | 1..... | 0.1317  | c...c...(... | 0.4043  |
| PT4-C...4... | 0.4389 | NNC-N...220. | 0.1411  | S2E0N...7-.. | 0.5201  | C..... | 0.4163  | c...(...c... | 0.4636  |
| PT4-N...5... | 0.3972 | NNC-C...321. | 0.4714  | S2E0C...7-.. | 2.1705  | (..... | 0.4577  | 1...c...(... | 0.0432  |
| PT4-C...10.. | 0.6786 | NNC-C...220. | 0.0933  | S2E0C...5-.. | 0.3441  | C..... | 0.4163  | c...1...(... | 2.2709  |
| PT4-N...4... | 0.353  | NNC-C...220. | 0.0933  | S2E0C...4-.. | -1.1756 | (..... | 0.4577  | F...(...1... | 0       |
| PT4-C...12.. | 0.3842 | NNC-C...220. | 0.0933  | S2E0C...9-.. | 0.1074  | C..... | 0.4163  | Cmax.2.....  | 0.4692  |
| PT4-C...9... | 0.074  | NNC-C...321. | 0.4714  | S2E0N...6-.. | 0.1176  | N..... | 0.3653  | Nmax.6.....  | 0.3261  |
| PT4-N...10.. | 0.0972 | NNC-C...220. | 0.0933  | S2E0C...4-.. | -1.1756 | 2..... | -0.9023 | Omax.0.....  | 0.4253  |
| PT4-C...9... | 0.074  | NNC-F...110. | 0       | S2E0N...5-.. | 0.1705  | (..... | 0.4577  | Smax.0.....  | 2.1015  |
| PT4-C...9... | 0.074  | C7.....0...  | 5.8174  | S2E0C...7-.. | 2.1705  | N..... | 0.3653  | NOSP10000000 | 0.4366  |
| PT4-C...5... | 0.3547 | C6...AH.3... | -0.0008 | S2E0C...9-.. | 0.1074  | c..... | 0.3688  | BOND11000000 | 0.2034  |
| PT4-C...11.. | 1.3977 | C5...AH.1... | 0.317   | S2E0C...5-.. | 0.3441  | 1..... | 0.1317  | ++++F---N=== | 0       |
| PT4-N...9... | 0.2243 | C4.....0...  | 8.4462  | S2E0C...4-.. | -1.1756 | c..... | 0.3688  | ++++F---B2== | 0       |
| PT4-C...8... | 0.2646 | C3.....0...  | 6.0724  | S2E0C...5-.. | 0.3441  | c..... | 0.3688  | ++++F---B3== | 0       |
| PT4-N...6... | 0.2569 | P2E0N...0-.. | 0.3058  | S2E0N...6-.. | 0.1176  | c..... | 0.3688  | ++++N---B2== | 10.0858 |
| PT4-C...10.. | 0.6786 | P2E0C...1-.. | 0.2059  | S2E0N...7-.. | 0.5201  | c..... | 0.3688  | ++++N---B3== | 0.225   |
| PT4-C...8... | 0.2646 | P2E0N...1-.. | 0.3356  | S2E0C...5-.. | 0.3441  | (..... | 0.4577  | ++++B2--B3== | -0.0024 |
| PT4-C...9... | 0.074  | P2E0C...1-.. | 0.2059  | S2E0C...4-.. | -1.1756 | c..... | 0.3688  |              |         |
| PT4-C...5... | 0.3547 | P2E0N...2-.. | 2.2812  | S2E0C...4-.. | -1.1756 | 1..... | 0.1317  |              |         |
| PT4-C...8... | 0.2646 | P2E0C...1-.. | 0.2059  | S2E0C...3-.. | 0.0092  | (..... | 0.4577  |              |         |

Table S3. The list of  $SA_k$ s together with their correlation weights for the three runs of the Monte Carlo optimization

| $SA_k$        | CW( $SA_k$ ) |          |          | $SA_k$       | CW( $SA_k$ ) |          |          | $SA_k$       | CW( $SA_k$ ) |          |          | $SA_k$        | CW( $SA_k$ ) |          |          |
|---------------|--------------|----------|----------|--------------|--------------|----------|----------|--------------|--------------|----------|----------|---------------|--------------|----------|----------|
|               | Run 1        | Run 2    | Run 3    |              | Run 1        | Run 2    | Run 3    |              | Run 1        | Run 2    | Run 3    |               | Run 1        | Run 2    | Run 3    |
| #.....        | 0.32946      | 0.48737  | 2.38191  | N...C.....   | -0.13565     | -0.77313 | 0.11324  | S2E0C...6--  | -0.06275     | -0.86997 | -0.73327 | VS2-C...10..  | 0.15648      | 0.13163  | 1.10461  |
| \$10011000000 | 0.1944       | 0.2978   | -0.32973 | N...C...1... | 2.13545      | 0.23208  | 0.0102   | S2E0C...7--  | 0.47941      | 2.17047  | 1.34843  | VS2-C...11..  | -1.24519     | -0.11844 | 0.22305  |
| \$10011000010 | 0.14153      | 0.31469  | 0.11874  | N...C...C... | 0.14729      | 0.32515  | 1.3843   | S2E0C...8--  | 0.48772      | 0.1889   | -0.2135  | VS2-C...12..  | 0.22925      | 0.19402  | 0.03171  |
| \$11010000000 | 0.11132      | 0.13777  | -0.03588 | N...H.....   | 0.16071      | 0.18982  | 0.01462  | S2E0C...9--  | 0.47568      | 0.10744  | -0.50569 | VS2-C...13..  | 0.09418      | 1.05171  | 0.48726  |
| \$11010000010 | 0.0967       | 2.07687  | -0.00348 | N...S...(... | 0.37336      | 0.08092  | 0.2816   | S2E0Br...3-- | 0.17877      | 0.47585  | 0.40341  | VS2-C...2...  | 0.60139      | 0.22828  | 0.15873  |
| \$11011000000 | 0.14275      | 0.20016  | -0.83225 | N...[...2... | 0.38541      | -0.09818 | -0.30319 | S2E0Cl...3-- | 1.38222      | -0.33276 | 0.15061  | VS2-C...3...  | 0.22413      | 0.41434  | 0.03527  |
| \$11011100000 | 0.4342       | 0.22978  | -0.94774 | N...[...3... | -0.88194     | 0.45368  | 0.07139  | S2E0N...0--  | 0.12971      | -0.53894 | 0.30654  | VS2-C...4...  | 0.38894      | 0.23977  | 0.48333  |
| (...(.....    | 0.23143      | 0.77079  | 0.58641  | N...\...(... | 0.03755      | 0.36019  | -0.31936 | S2E0N...1--  | 0.37408      | 0.34366  | -0.09567 | VS2-C...5...  | 0.30817      | 0.41557  | 0.31929  |
| (.....        | 0.11498      | 0.45774  | 0.23651  | N...\...C... | 0.25674      | 0.68562  | 2.19699  | S2E0N...3--  | 0.48462      | 0.42871  | 1.09018  | VS2-C...6...  | 0.17167      | 0.02775  | 0.22804  |
| (...C...(...  | 0.05513      | 0.794    | 0.45524  | N...c...1... | 0.293        | 1.17016  | 0.65727  | S2E0N...4--  | 0.30228      | 0.12893  | -0.16093 | VS2-C...7...  | -1.21082     | -0.45465 | 0.31108  |
| (...Br...(... | 2.10116      | 0.14235  | -0.27048 | N...c...3... | 0.24262      | 2.23557  | -0.00452 | S2E0N...5--  | 0.10922      | 0.17054  | 0.35939  | VS2-C...8...  | 0.15647      | 0.41877  | 0.48821  |
| (...N...#...  | 0.25303      | 0.34576  | 0.49898  | O...(...(... | -1.48266     | -0.97341 | -0.04956 | S2E0N...6--  | 0.15507      | 0.11763  | 2.01639  | VS2-C...9...  | 0.13427      | 0.13628  | 0.2101   |
| (...N...(...  | 0.03105      | -1.24206 | -0.9964  | O...(.....   | 0.19651      | -0.08424 | -1.08045 | S2E0N...7--  | 2.27846      | 0.52006  | 0.44361  | VS2-Br...4... | 0.02645      | 0.0105   | 0.29197  |
| +++B2--B3==   | 0.30782      | -0.0024  | 0.07393  | O...(...C... | -2.08071     | -1.98211 | -0.65607 | S2E0N...8--  | -1.06556     | -0.78966 | -0.89021 | VS2-Cl...4... | 0.46471      | -0.39184 | -0.43522 |
| +++CL--N===   | 0.11611      | 1.64146  | 1.02437  | O...(...N... | 0.43306      | 0.20001  | 0.26434  | S2E0O...1--  | -0.83093     | -0.6051  | -0.45383 | VS2-N...10..  | 0.09782      | 0.41771  | 0.30405  |
| +++Br--B2==   | 0.23044      | 0.15858  | 0.26571  | O...(...O... | 0.32043      | -0.03137 | 0.12623  | S2E0O...2--  | 0.01481      | 0.46497  | 0.11562  | VS2-N...11..  | -2.25211     | -0.91478 | -0.63561 |
| +++Br--B3==   | -0.29204     | -1.07435 | 1.72553  | O.....       | 1.31963      | 0.69123  | 0.17923  | S2E0O...4--  | 0.19954      | 0.14415  | 0.2206   | VS2-N...2...  | 0.32618      | -3.46738 | -5.24173 |
| +++Br--N===   | 0.27215      | 0.09146  | 0.50591  | O...=...(... | -0.92865     | -1.12335 | -0.16063 | S2E0O...5--  | 1.74544      | -0.08768 | 0.02517  | VS2-N...3...  | 0.08417      | -0.09413 | 0.14119  |
| +++Br--O===   | 0.38937      | 0.02276  | 0.07665  | O...=.....   | 0.23694      | 0.08863  | 0.61552  | S2E0O...6--  | 0.4241       | 0.2165   | 0.17128  | VS2-N...5...  | 0.30946      | 0.06228  | 0.1483   |
| +++Cl--B2==   | 0.05023      | 1.79694  | -0.12467 | O...=...C... | 2.23599      | 1.40581  | 1.35881  | S3E0C...1--  | 0.0956       | 0.05446  | -0.51382 | VS2-N...6...  | 1.37035      | 0.13795  | 0.10851  |
| +++Cl--B3==   | 0.17249      | -0.04505 | 0.46992  | O...C...(... | 0.24877      | 0.54367  | 2.23245  | S3E0C...10-  | 0.38178      | 0.19135  | 0.3527   | VS2-N...7...  | 0.4469       | -0.897   | 0.32728  |
| +++N--B2==    | 3.61673      | 10.08577 | 8.26465  | O...C.....   | 0.56341      | 1.09501  | 0.02571  | S3E0C...11-  | 0.41083      | 0.18159  | 0.39485  | VS2-N...8...  | 0.40719      | 0.5662   | 0.41762  |
| +++N--B3==    | 0.95092      | 0.22495  | -0.08067 | O...C...C... | 0.56524      | 0.16685  | 1.44368  | S3E0C...12-  | -0.35495     | -0.62303 | -1.28797 | VS2-N...9...  | 0.34436      | 0.335    | 0.01651  |
| +++N--O===    | 0.06476      | 0.68371  | 0.29106  | O...c...1... | 0.1024       | 0.24977  | -0.18713 | S3E0C...13-  | -0.85024     | -1.72571 | -1.11698 | VS2-O...2...  | 0.51725      | 3.27547  | -0.17923 |
| +++N--S===    | 0.04581      | 0.83305  | 0.26807  | P2E0C...0--  | 0.5689       | 0.24384  | 0.62422  | S3E0C...14-  | -1.0367      | 0.17109  | -0.48051 | VS2-O...4...  | -0.05508     | -0.56118 | 2.15812  |
| +++O--B2==    | 0.43002      | 0.45828  | 0.30039  | P2E0C...1--  | 0.47456      | 0.20587  | 0.03326  | S3E0C...2--  | 0.19592      | 0.36911  | -0.04748 | VS2-O...5...  | 0.1838       | 0.28867  | 0.23929  |
| +++O--B3==    | -0.09423     | 0.46905  | -0.60241 | P2E0C...2--  | 0.45923      | 0.20708  | 0.2841   | S3E0C...3--  | 1.02142      | 0.47201  | 0.09408  | VS2-O...6...  | 0.35656      | 0.1445   | 1.48642  |
| +++O--S===    | 0.00195      | 0.28085  | -0.26679 | P2E0C...3--  | -7.64762     | -4.79561 | -3.27559 | S3E0C...4--  | 0.64911      | 0.23242  | -0.17332 | VS2-O...7...  | 0.14229      | 1.35481  | 0.47404  |
| +++S--B2==    | -0.26568     | -0.44694 | -0.27422 | P2E0Br...1-- | 0.30335      | 0.43932  | 0.43055  | S3E0C...5--  | 0.35472      | 0.38551  | 0.37562  | VS2-O...8...  | 0.0084       | 0.07172  | 0.34956  |
| +++S--B3==    | -0.97995     | -0.5982  | 0.06808  | P2E0Cl...1-- | -0.16738     | -0.32136 | 0.26514  | S3E0C...6--  | 0.17425      | 0.45982  | -0.26633 | VS3-C...10..  | 0.36568      | 0.37958  | 0.19947  |
| /.....        | 0.05541      | 2.00888  | 0.16705  | P2E0N...0--  | 0.72435      | 0.30577  | 0.09066  | S3E0C...7--  | 0.24164      | 0.10422  | 0.22207  | VS3-C...11..  | 0.19171      | 0.44265  | 0.32155  |

|              |          |          |          |               |          |          |          |               |          |          |          |               |          |          |          |
|--------------|----------|----------|----------|---------------|----------|----------|----------|---------------|----------|----------|----------|---------------|----------|----------|----------|
| /...C...(... | 1.49955  | 0.11141  | 0.04012  | P2E0N...1-..  | 0.19657  | 0.33561  | 2.29845  | S3E0C...8-..  | 0.24363  | -0.2491  | 0.45554  | VS3-C...12..  | 0.33837  | -0.11511 | 0.33521  |
| /...N...(... | 0.45432  | -0.54173 | -0.02883 | P2E0N...2-..  | 0.18491  | 2.28115  | 0.73084  | S3E0C...9-..  | 0.11024  | 0.11019  | 0.19351  | VS3-C...13..  | 0.42308  | 0.18499  | -0.21845 |
| 1...(.....   | 0.06707  | 0.13647  | -0.0665  | P2E0N...3-..  | 1.06551  | 0.68539  | -0.59582 | S3E0Br...4-.. | 0.24432  | 0.54509  | 0.05961  | VS3-C...14..  | -0.07263 | 0.21751  | 0.20856  |
| 1.....       | 0.09754  | 0.13174  | 0.25502  | P2E0O...0-..  | 0.07999  | -0.87984 | -0.0405  | S3E0Cl...4-.. | -0.32643 | 0.91379  | 2.51528  | VS3-C...15..  | -1.07965 | 0.26501  | -0.83939 |
| 1...2...(... | 0.41779  | 2.2219   | 0.09354  | P2E0O...1-..  | -0.03893 | -0.07769 | -0.92606 | S3E0N...0-..  | 0.3967   | 0.1943   | -0.49454 | VS3-C...16..  | -0.61614 | 0.92631  | 0.41129  |
| 1...C...(... | 0.08883  | 0.47765  | 0.80083  | P2E0O...2-..  | 0.28658  | 0.49495  | 0.44083  | S3E0N...1-..  | -0.33959 | 0.06936  | 0.24137  | VS3-C...3...  | 0.17723  | -0.18667 | -1.9945  |
| 1...N...(... | 0.05337  | 0.32468  | 0.29071  | P2E0S...1-..  | 0.10423  | 0.38297  | -0.41976 | S3E0N...10-   | 0.32377  | -1.37483 | 0.5811   | VS3-C...4...  | 0.26708  | 0.15917  | 0.03344  |
| 1...c...(... | 1.15114  | 0.04325  | -0.49654 | P3E0C...0-..  | -0.8437  | -0.0974  | 0.18248  | S3E0N...11-   | 0.24006  | 0.17675  | 0.1288   | VS3-C...5...  | 0.08598  | 0.27962  | 0.21333  |
| 2...(.....   | 4.01411  | 4.1134   | 0.86075  | P3E0C...1-..  | 0.32494  | 0.21846  | 0.21054  | S3E0N...12-   | 0.03196  | 2.24059  | 0.04896  | VS3-C...6...  | 0.22348  | 0.21798  | 0.16061  |
| 2.....       | 0.34589  | -0.90226 | 0.32706  | P3E0C...2-..  | 0.42625  | 0.02551  | 0.34005  | S3E0N...13-   | 0.03791  | 0.129    | 0.35755  | VS3-C...7...  | 2.17472  | 0.23459  | 0.00533  |
| 2...1.....   | 0.41299  | -0.2052  | 0.41975  | P3E0C...3-..  | -0.7988  | 0.03673  | -0.38615 | S3E0N...15-   | 0.04224  | -0.09893 | -0.65237 | VS3-C...8...  | 0.11352  | 0.23339  | -0.30598 |
| 2...C...(... | 0.15685  | 0.46371  | -0.81381 | P3E0C...4-..  | 0.44325  | 0.01553  | 0.49642  | S3E0N...2-..  | 0.87942  | 1.91285  | 0.17063  | VS3-C...9...  | 0.39896  | 0.41969  | -0.54472 |
| 2...N...(... | 0.4223   | 0.1067   | -0.06664 | P3E0C...5-..  | 0.3169   | 0.10017  | 0.13154  | S3E0N...3-..  | 0.11181  | 0.11775  | 0.16537  | VS3-Br...5... | 0.74652  | 0.16972  | 0.02335  |
| 2...c...(... | 0.43456  | 0.25448  | -0.87266 | P3E0Br...1-.. | 2.00261  | 0.29773  | 0.30387  | S3E0N...4-..  | 0.49386  | 0.07921  | 0.12833  | VS3-Cl...5... | 1.50737  | 0.42821  | 0.57307  |
| 2...c...1... | 0.31847  | 0.64813  | 0.41264  | P3E0Cl...1-.. | -0.15823 | 0.16702  | 1.21896  | S3E0N...5-..  | -0.5149  | 0.42841  | 0.51583  | VS3-N...10..  | 2.35389  | 0.38038  | 0.27591  |
| 3...(.....   | 0.33169  | 0.43563  | 0.24998  | P3E0N...0-..  | 0.15642  | 0.37071  | 0.15074  | S3E0N...6-..  | 0.35318  | 0.15685  | 0.05093  | VS3-N...11..  | 0.29584  | 0.23807  | 0.48885  |
| 3.....       | 0.23099  | 0.15106  | -0.64067 | P3E0N...1-..  | -1.31304 | -0.53027 | -0.54804 | S3E0N...7-..  | 0.28842  | 1.23677  | 0.77205  | VS3-N...12..  | 0.14608  | -0.02803 | -0.32827 |
| 3...2...(... | -0.17279 | -0.06114 | 2.11127  | P3E0N...2-..  | 0.4558   | 0.47778  | -0.89357 | S3E0N...8-..  | 0.36592  | 0.12603  | 0.0623   | VS3-N...13..  | 0.25153  | -0.99666 | -0.74343 |
| 3...2.....   | 0.32204  | 0.09101  | -0.89292 | P3E0N...3-..  | 0.11709  | 0.16729  | 0.15153  | S3E0N...9-..  | -0.64501 | 0.39446  | 0.30448  | VS3-N...14..  | -1.09252 | -0.40347 | 0.1804   |
| 3...N...(... | 2.10973  | 0.23792  | -0.09032 | P3E0N...4-..  | 0.06905  | 0.18018  | 0.14591  | S3E0O...1-..  | 0.22873  | 0.80331  | 2.2152   | VS3-N...15..  | 0.11649  | 0.0911   | 0.56915  |
| 3...c...(... | -0.82652 | 0.17299  | 0.08687  | P3E0O...0-..  | 0.05759  | 0.41736  | 0.73744  | S3E0O...3-..  | 0.30249  | 0.43721  | 0.15438  | VS3-N...16..  | 0.01272  | 0.19012  | 0.49845  |
| =...(.....   | -0.87501 | 0.82909  | -0.6894  | P3E0O...1-..  | 0.43918  | -1.22559 | 0.41885  | S3E0O...4-..  | 0.41681  | 0.27418  | 0.46227  | VS3-N...18..  | -0.09301 | -0.22523 | -0.1193  |
| =...(.....   | 0.27927  | 0.23788  | 0.17574  | P3E0O...2-..  | 0.4601   | -1.24481 | -0.92661 | S3E0O...5-..  | 0.2078   | -0.14483 | -0.28427 | VS3-N...3...  | -3.34381 | -3.17708 | -1.68203 |
| =...(...3... | 0.14025  | 0.43519  | -0.21217 | P3E0O...3-..  | -0.4988  | 0.31371  | 0.72684  | S3E0O...6-..  | 0.4234   | 0.43034  | 0.25262  | VS3-N...4...  | -0.97355 | -3.16565 | -1.78109 |
| =.....       | 0.10972  | 0.22008  | -0.65747 | P4E0C...0-..  | -0.48378 | -0.95133 | -0.2719  | S3E0O...7-..  | 0.39936  | 0.39399  | 2.37876  | VS3-N...5...  | 0.44664  | 0.12344  | 0.26177  |
| =...C...(... | 0.00698  | 2.17709  | 0.27308  | P4E0C...1-..  | 0.4549   | 0.35804  | 0.04738  | S3E0O...8-..  | -1.69554 | -0.60074 | 0.56023  | VS3-N...6...  | 0.00442  | 0.10504  | 0.41697  |
| =...O...(... | -0.80754 | -0.2423  | -0.62043 | P4E0C...10-   | 0.25766  | 0.45344  | 0.09047  | S3E0S...3-..  | 0.16123  | 0.08027  | -0.58835 | VS3-N...7...  | 0.10975  | 0.31897  | 1.23354  |
| C...#.....   | 0.31343  | 0.26173  | 0.42438  | P4E0C...11-   | 0.17069  | 0.27522  | 0.07429  | PT2-C...1...  | -0.22953 | 0.27042  | 0.47852  | VS3-N...8...  | 1.36786  | 0.32743  | -0.26879 |
| C...(.....   | 0.21772  | 0.44829  | 0.35782  | P4E0C...12-   | 1.1632   | 0.22889  | 0.38355  | PT2-C...2...  | 0.2877   | 0.33069  | 0.36664  | VS3-N...9...  | -0.93317 | 0.40609  | 0.31601  |
| C...(...1... | 1.08394  | 0.30232  | 0.0066   | P4E0C...2-..  | 0.30419  | 1.31503  | 0.30479  | PT2-C...3...  | 0.48378  | 0.08956  | -0.51376 | VS3-O...2...  | 0.12593  | 0.22579  | 1.41717  |
| C...(...2... | 0.26129  | 0.01568  | 0.35015  | P4E0C...3-..  | -0.72289 | 0.30968  | 0.02901  | PT2-C...4...  | 0.13486  | 0.20167  | 0.38332  | VS3-O...4...  | -0.67975 | 0.07097  | 1.06823  |
| C...(...=... | 0.03112  | -0.49494 | 0.02044  | P4E0C...4-..  | 0.07894  | 0.0119   | 0.27475  | PT2-C...5...  | 2.36311  | 2.41797  | 0.15748  | VS3-O...5...  | 1.47746  | 0.14153  | -0.79104 |
| C...(...C... | 0.13926  | 0.26403  | 0.2008   | P4E0C...5-..  | 0.35038  | 0.31615  | 0.41098  | PT2-C...6...  | -2.52043 | -1.09018 | -5.19311 | VS3-O...6...  | 0.29737  | -0.8501  | 0.33058  |
| C.....       | 0.01883  | 0.41631  | 0.31169  | P4E0C...6-..  | 0.1942   | 0.0656   | 0.00635  | PT2-Br...2... | 0.20062  | 0.47003  | 0.18967  | VS3-O...7...  | 0.04141  | -0.00002 | -0.50708 |
| C.../.....   | 0.41153  | 0.29456  | 0.69587  | P4E0C...7-..  | 0.46444  | 0.17545  | 0.28842  | PT2-Cl...2... | -0.15414 | 0.31983  | 0.39862  | VS3-O...8...  | 2.11067  | 0.41834  | 0.20431  |



|              |         |          |          |               |          |          |          |               |          |          |          |               |          |          |          |
|--------------|---------|----------|----------|---------------|----------|----------|----------|---------------|----------|----------|----------|---------------|----------|----------|----------|
| C...1...(... | 0.28698 | -0.06602 | 0.47671  | P4E0C...8-..  | -0.24374 | 0.0041   | 1.33209  | PT2-N...1...  | 0.0172   | 0.36004  | 0.1781   | VS3-O...9...  | 0.21109  | 0.27144  | 0.47186  |
| C...1.....   | 2.44644 | 0.18411  | 1.18663  | P4E0C...9-..  | 0.01075  | 0.25452  | -0.99707 | PT2-N...2...  | 0.47969  | -0.60099 | 0.23827  | VS3-S...7...  | 0.49356  | 0.21135  | 0.1135   |
| C...1...C... | 0.27609 | 0.37979  | 0.07966  | P4E0Br...1-.. | 0.14441  | 0.32307  | 0.28162  | PT2-N...3...  | 0.21724  | 0.01877  | 0.47569  | Smax.0.....   | 0.74627  | 2.10145  | 0.42931  |
| C...2.....   | 0.26688 | -0.15329 | 0.25151  | P4E0Cl...1-.. | 1.1571   | 1.86831  | -0.08554 | PT2-N...4...  | 0.47555  | -0.49893 | -0.1221  | Smax.1.....   | 0.14372  | 0.3172   | 0.4708   |
| C...2...C... | 0.2888  | 0.24513  | 0.38791  | P4E0N...0-..  | 0.15624  | 0.07248  | 0.34169  | PT2-N...5...  | 0.7306   | 0.37532  | 0.06725  | [.....]       | 0.00059  | 0.14549  | 0.00159  |
| C...3.....   | 0.12557 | 0.32699  | 0.2429   | P4E0N...1-..  | 0.45242  | 0.0108   | 0.2628   | PT2-N...6...  | 0.17028  | 0.03627  | 0.48734  | [...2.....]   | 1.43148  | 0.90421  | -1.59015 |
| C...=.....   | 2.46534 | 1.61077  | 2.24359  | P4E0N...10-   | 0.13381  | 0.28946  | 0.18355  | PT2-O...1...  | 0.0587   | -0.16848 | 0.2616   | [...3.....]   | 0.1546   | 0.3445   | 0.13388  |
| C...=...C... | 0.47665 | 0.25062  | 0.28226  | P4E0N...2-..  | -1.20057 | -1.98746 | 0.52752  | PT2-O...2...  | -0.82489 | 0.13718  | -0.70849 | [...H.....]   | 0.06239  | 0.33066  | 0.16526  |
| C...C...(... | 0.40757 | 0.45197  | 0.04767  | P4E0N...3-..  | 0.4182   | 2.28195  | -0.06401 | PT2-O...3...  | -1.77439 | -1.47942 | -0.85554 | [...H...N...] | 0.04605  | 0.16058  | 0.48319  |
| C...C.....   | 0.33842 | 0.28198  | 0.33169  | P4E0N...4-..  | 0.19258  | 0.21589  | -0.56307 | PT2-O...4...  | 0.08577  | 0.06907  | 0.16184  | [...N.....]   | 0.22734  | -0.0054  | 1.48698  |
| C...C...1... | 0.47944 | 0.3636   | 0.33266  | P4E0N...5-..  | 2.0657   | 0.01891  | 0.07131  | PT2-S...3...  | 0.32289  | 0.25293  | -0.97217 | [...N...H...] | 0.02014  | 0.05997  | 0.0174   |
| C...C...2... | 0.39719 | 0.08831  | 0.42369  | P4E0N...6-..  | 0.34403  | 0.44557  | -0.646   | PT3-C...1...  | 0.46163  | 0.28099  | -0.12475 | \...(.....)   | 0.01564  | -0.09799 | 0.24185  |
| C...C...3... | 0.19171 | -0.51317 | 2.29022  | P4E0N...7-..  | 0.0503   | 0.26406  | 0.73586  | PT3-C...2...  | 0.48326  | 0.1335   | 0.27982  | \...(...C...) | 0.57798  | 0.08036  | 0.35944  |
| C...C...=... | 0.15742 | 0.25513  | 0.09303  | P4E0N...8-..  | 0.1944   | 0.47002  | -1.08275 | PT3-C...3...  | 0.10015  | 0.14873  | 0.33426  | \.....        | 0.01273  | 0.28718  | 0.82846  |
| C...C...C... | 0.02202 | 2.46509  | 0.98626  | P4E0N...9-..  | 0.20475  | 0.21436  | 0.08427  | PT3-C...4...  | -0.31023 | 0.27343  | -0.88704 | \...C...#...  | 0.2711   | -0.88842 | -0.02744 |
| C...N...(... | 0.12816 | 0.23005  | -0.03282 | P4E0O...0-..  | 0.57981  | 0.01051  | 0.15701  | PT3-C...5...  | -0.71909 | -0.33439 | -0.14607 | \...C...(...  | -0.71516 | 0.43186  | 0.11835  |
| C...N...2... | 0.14159 | 0.05734  | 0.12881  | P4E0O...4-..  | -0.86749 | 0.44253  | -0.31087 | PT3-C...6...  | 1.47793  | 1.44286  | 0.04636  | \...C.....    | 0.23875  | 0.35255  | 0.12396  |
| C...N...=... | 3.14488 | 0.66886  | 0.32574  | P4E0O...9-..  | 0.18301  | 0.01601  | 0.40059  | PT3-C...7...  | 0.41341  | 0.22166  | 0.52952  | \...N...(...  | 0.49617  | 0.23616  | 0.55633  |
| C...N...C... | 0.25275 | -0.8166  | -0.20608 | NNC-C...101.  | 0.01584  | 0.16402  | 0.32156  | PT3-C...8...  | 0.29086  | 0.35414  | 0.44836  | \...N.....    | 0.4687   | 0.02584  | 0.39484  |
| C...O...(... | 0.38272 | -0.02627 | -0.20617 | NNC-C...110.  | 0.12836  | 0.3021   | 0.27421  | PT3-Br...2... | 0.30904  | 0.17408  | 0.06934  | \...N...=...  | 0.25858  | 0.10997  | -0.70813 |
| C...c...1... | 0.26751 | -0.64702 | -0.02873 | NNC-C...202.  | 2.01989  | -0.9498  | -1.32226 | PT3-Cl...2... | 2.11155  | -0.37219 | 1.04435  | c...(.....)   | 0.18518  | 0.00223  | 0.18374  |
| C3.....0...  | 3.43042 | 6.07245  | 3.24392  | NNC-C...211.  | 2.05549  | 2.20332  | 0.43889  | PT3-N...1...  | -0.58767 | 0.15512  | -0.7275  | c...(...1...  | 0.02533  | 0.37079  | -0.00388 |
| C4.....0...  | 2.02107 | 8.44617  | 6.04264  | NNC-C...220.  | 0.15528  | 0.09332  | -0.6283  | PT3-N...2...  | 0.02842  | 0.4137   | 0.22241  | c...(...2...  | 0.20071  | -0.11716 | 0.12042  |
| C5.....0...  | 0.10643 | 0.47777  | 0.57879  | NNC-C...303.  | 0.26279  | 0.23619  | 0.32344  | PT3-N...3...  | 0.07773  | 0.27279  | 0.46233  | c...(...C...  | 2.32343  | 0.3025   | 1.18845  |
| C5...AH.1... | 0.36897 | 0.317    | -0.47008 | NNC-C...312.  | -0.21689 | -0.18396 | 0.00843  | PT3-N...4...  | 0.30115  | 0.18583  | 0.28771  | c...(...Br... | -0.8029  | 0.48324  | 0.98768  |
| C6...AH.3... | 2.44082 | -0.00083 | 0.02565  | NNC-C...321.  | 0.31087  | 0.4714   | 0.29642  | PT3-N...5...  | -0.78976 | 1.14347  | 0.1991   | c...(...N...  | 0.24138  | 0.15891  | 0.47894  |
| C6...AH.4... | 0.15856 | 0.3686   | -0.51468 | NNC-C...330.  | 0.34653  | 0.25099  | 0.11494  | PT3-N...6...  | -0.18457 | -0.52409 | -1.81585 | c...(...O...  | 0.07753  | 0.47983  | 0.48228  |
| C6...AH.5... | 0.04782 | 0.04935  | -0.08429 | NNC-C...431.  | 0.1892   | 0.41227  | 1.38023  | PT3-N...7...  | 0.32103  | -0.7165  | 0.472    | c...(...c...  | 0.36584  | 0.46362  | 2.54689  |
| C7.....0...  | 4.47615 | 5.81739  | 6.21642  | NNC-C...440.  | 0.14142  | 0.15901  | -0.01867 | PT3-O...1...  | 0.58327  | 0.15276  | 0.23065  | c.....        | 0.24789  | 0.36876  | -0.95711 |
| BOND10000000 | 0.0947  | 0.20708  | 0.48934  | NNC-Br...110. | 0.24852  | 0.10403  | 0.12934  | PT3-O...2...  | 0.1167   | 0.06936  | 0.13726  | c...1...(...  | 0.67951  | 2.27091  | 2.29314  |
| BOND11000000 | 0.09195 | 0.20343  | 1.42165  | NNC-Cl...110. | 0.18049  | 1.32182  | 0.6086   | PT3-O...3...  | 0.47683  | 0.16928  | 0.24801  | c...1.....    | 0.28067  | 0.37792  | 0.44293  |
| EC0-C...1... | 0.39844 | 0.38611  | 0.30899  | NNC-N...110.  | 0.72668  | 0.33852  | 0.45335  | PT3-O...4...  | 0.35116  | 0.10155  | 0.26476  | c...1...2...  | 0.65041  | 0.13492  | -0.87204 |
| EC0-C...2... | 0.36222 | 0.15756  | -0.09071 | NNC-N...211.  | 0.18188  | -0.98283 | 0.4638   | PT4-C...1...  | 0.29492  | 0.34283  | -0.54495 | c...1...C...  | 0.28489  | 0.14375  | 0.08277  |
| EC0-C...3... | 0.44324 | 0.2223   | 0.13148  | NNC-N...220.  | 0.47253  | 0.14115  | 0.42017  | PT4-C...10..  | 0.38093  | 0.6786   | 0.28802  | c...1...c...  | 0.07217  | 0.46107  | 0.11666  |
| EC0-C...4... | 0.15014 | 0.1363   | 0.09523  | NNC-N...330.  | 0.04555  | 0.26378  | -0.1723  | PT4-C...11..  | 0.17336  | 1.39766  | 0.09039  | c...2.....    | 0.15323  | 0.38012  | 0.49357  |

|              |          |          |          |              |          |          |          |              |          |          |          |              |          |          |          |
|--------------|----------|----------|----------|--------------|----------|----------|----------|--------------|----------|----------|----------|--------------|----------|----------|----------|
| EC0-Br.1...  | 0.38613  | 0.1857   | 0.4249   | NNC-O...101. | 0.03285  | 0.54919  | -0.76712 | PT4-C...12.. | 2.42516  | 0.38424  | 0.25557  | c...2...1... | 0.00889  | -0.27665 | 0.37941  |
| EC0-Cl.1...  | 2.15395  | 0.02506  | -0.48192 | NNC-O...110. | -0.00911 | 0.17043  | -0.90832 | PT4-C...13.. | 0.39976  | 0.05337  | 0.24989  | c...2...[... | 0.53082  | 0.1274   | 0.70847  |
| EC0-N...1... | 0.15791  | 0.02856  | 2.27149  | NNC-O...220. | 0.38314  | 0.15568  | 0.43839  | PT4-C...14.. | 0.33079  | 0.66525  | 0.05084  | c...2...c... | 0.26295  | 0.4037   | 0.12686  |
| EC0-N...2... | 0.41353  | 0.62141  | 0.33826  | NNC-S...413. | 0.55412  | 0.98662  | 0.11139  | PT4-C...2... | 0.21689  | 2.35433  | 0.03486  | c...3...(... | 0.36046  | 0.07441  | 0.13861  |
| EC0-N...3... | 0.13154  | 0.07887  | 0.33148  | NNE0C...100- | 0.33861  | 0.15344  | 0.20507  | PT4-C...3... | 0.11045  | 0.1736   | 0.10845  | c...3.....   | 0.10289  | 0.19595  | 0.36286  |
| EC0-O...1... | 0.41258  | -0.6092  | 0.02379  | NNE0C...109- | 0.02186  | 0.07924  | 0.78649  | PT4-C...4... | 0.01774  | 0.43892  | 0.37802  | c...3...2... | 0.15095  | 0.20793  | 0.33554  |
| EC0-O...2... | 0.22276  | 0.18714  | 0.48616  | NNE0C...200- | -0.44246 | -2.11764 | -0.75813 | PT4-C...5... | 0.24115  | 0.35472  | 0.07726  | c...3...[... | 0.35227  | 0.36792  | 0.38348  |
| EC0-S...4... | 0.55994  | 0.25936  | 0.15734  | NNE0C...209- | 0.03389  | 0.0137   | 0.10251  | PT4-C...6... | 0.09063  | 0.10044  | -0.09419 | c...3...c... | 0.10671  | -1.03252 | -0.16597 |
| H.....       | 0.29897  | -0.1356  | 0.18505  | NNE0C...218- | 0.03505  | 0.13889  | 0.47659  | PT4-C...7... | 0.14945  | -0.11653 | 0.24441  | c...C...(... | 0.20174  | 0.03618  | 0.1672   |
| Br.(.....    | -0.72178 | -1.16113 | -1.17056 | NNE0C...300- | 0.03615  | 0.38378  | 0.33599  | PT4-C...8... | 0.21445  | 0.26465  | 0.06781  | c...C.....   | 0.07144  | 0.2066   | -0.88998 |
| Br.(...1...  | 1.27762  | 1.75292  | 0.51295  | NNE0C...309- | 0.49108  | -0.06989 | -0.09437 | PT4-C...9... | 0.38592  | 0.07399  | 0.48843  | c...Br.....  | 0.45473  | 0.30542  | -0.34123 |
| Br.....      | 0.1176   | 0.41337  | -0.33082 | NNE0C...318- | 0.28919  | 0.26334  | -0.025   | PT4-Br.2...  | 0.14934  | 0.41882  | 0.07213  | c...N...(... | 2.61086  | 2.07128  | -0.16789 |
| Br.c...1...  | 0.37846  | 0.44858  | 0.41225  | NNE0C...327- | 0.29662  | -0.29119 | -0.71918 | PT4-Cl.2...  | -0.58628 | -0.06776 | 1.70144  | c...N.....   | 0.158    | 0.46702  | -0.08413 |
| Cl.(.....    | 0.41253  | 0.32934  | 0.46514  | NNE0C...427- | 0.21255  | 0.87578  | -0.18389 | PT4-N...1... | -0.28657 | 0.01247  | 0.4172   | c...N...\... | 0.41856  | 0.0987   | 0.40374  |
| Cl.....      | 0.03162  | 1.16957  | -0.22598 | NNE0C...436- | 0.24878  | 0.04375  | 0.1354   | PT4-N...10.. | -0.16413 | 0.09716  | 0.34058  | c...O...(... | 0.0678   | -0.53617 | 0.34202  |
| Cmax.2.....  | 0.3279   | 0.46915  | 0.28251  | NNE0Br.109-  | 0.26396  | 0.02242  | -0.05151 | PT4-N...11.. | 0.0012   | 0.30545  | 0.35241  | c...O.....   | 0.18388  | -0.58738 | 0.18489  |
| Cmax.3.....  | 0.06471  | 0.48518  | 0.29309  | NNE0Cl.109-  | 1.5214   | 0.05664  | 0.43587  | PT4-N...13.. | 0.01712  | 0.45595  | 0.31041  | c...O...C... | 0.38348  | 0.47086  | 0.00206  |
| N...#.....   | 0.3872   | 0.12214  | 0.40403  | NNE0N...109- | 0.45168  | 0.02051  | 0.61273  | PT4-N...3... | 0.04968  | 0.21291  | 0.27491  | c...[.....   | 0.07635  | 0.22233  | 0.27122  |
| N...#...C... | 0.41732  | 0.22434  | 0.37538  | NNE0N...209- | 0.00606  | 0.10597  | 0.08515  | PT4-N...4... | 0.51443  | 0.35305  | 0.43682  | c...[...H... | -0.74056 | 0.32166  | 0.11499  |
| N...(.....   | 0.32032  | 0.33336  | 2.32369  | NNE0N...218- | 1.28162  | 0.19301  | 0.02057  | PT4-N...5... | 0.49037  | 0.39724  | 0.4186   | c...[...N... | 0.24054  | 0.2169   | -0.80053 |
| N...(...1... | 4.46569  | 8.05081  | 0.44099  | NNE0N...327- | 0.04946  | 0.4929   | 0.41174  | PT4-N...6... | 0.40749  | 0.25692  | 0.04448  | c...c...(... | 0.08393  | 0.4043   | 0.35623  |
| N...(...2... | 0.23574  | -0.08308 | 0.11978  | NNE0O...100- | 0.21593  | 0.27353  | 0.37818  | PT4-N...7... | 0.22606  | 0.04286  | 0.43915  | c...c.....   | 0.28834  | 0.32376  | 0.10297  |
| N...(...C... | 1.88365  | 3.24229  | 0.83165  | NNE0O...109- | 0.18627  | -0.87865 | 0.1389   | PT4-N...8... | 0.17348  | 0.24139  | 0.45845  | c...c...1... | 0.01176  | 0.13088  | -0.93791 |
| N...(...N... | 0.22948  | -0.68257 | 0.14983  | NNE0O...218- | 0.25647  | 0.36923  | 0.48458  | PT4-N...9... | 0.72476  | 0.22427  | 0.00994  | c...c...3... | 0.24575  | -0.05597 | 0.29779  |
| N.....       | 0.48622  | 0.36526  | 0.29685  | NNE0S...409- | 0.13498  | 0.21804  | -0.34943 | PT4-O...1... | 0.49159  | 0.12458  | 0.2791   | c...c...[... | 0.28764  | 0.02217  | 0.26201  |
| N.../.....   | 0.12919  | -0.22935 | 0.31583  | NOSP10000000 | 0.44247  | 0.43657  | -0.03389 | PT4-O...10.. | 0.09435  | 0.22202  | -0.47523 | c...c...c... | 0.29642  | 0.18786  | 0.37814  |
| N.../...C... | 0.27891  | 0.37225  | 0.39283  | NOSP11000000 | 0.15554  | 0.04116  | 0.4635   | PT4-O...2... | 0.27016  | 0.06278  | 0.17795  | c...n...1... | -0.66044 | -0.07037 | 1.43231  |
| N...1.....   | 0.17308  | 0.51616  | 0.25322  | NOSP11100000 | 0.25536  | 0.50542  | 0.42514  | PT4-O...5... | -0.7774  | 0.40466  | 0.45625  | c...n...2... | 0.38215  | 0.43564  | -0.8165  |
| N...1...C... | -2.29436 | -5.1167  | -2.73363 | S...(.....   | 0.08992  | 0.34873  | 0.58056  | PT4-O...6... | 0.00257  | 0.69735  | -0.94362 | c...n...c... | 0.15493  | 6.28061  | 6.96756  |
| N...2...(... | 0.18823  | 2.02126  | -0.13518 | S...(.=...   | 1.3745   | 0.33608  | -0.48343 | Nmax.3.....  | -1.86652 | -0.54421 | -3.19986 | n.....       | 0.08171  | -0.05604 | 0.66769  |
| N...2.....   | 0.22795  | 0.35763  | 0.31143  | S.....       | 0.77772  | -0.6587  | 0.70181  | Nmax.4.....  | 1.58594  | 0.1059   | 0.3467   | n...1.....   | -0.28004 | 0.46033  | 0.32107  |
| N...2...C... | 0.35162  | 0.19733  | 0.31038  | S...N.....   | -0.03954 | -0.59169 | 0.06431  | Nmax.5.....  | 1.21875  | 1.98948  | 2.74845  | n...1...c... | 0.3328   | -1.00692 | -0.27801 |
| N...3.....   | 0.11617  | 0.06477  | -0.61864 | S2E0C...0-.. | 0.44771  | 0.07249  | 0.30197  | Nmax.6.....  | 0.27603  | 0.32609  | 0.47205  | n...2.....   | 0.34896  | 0.00608  | 0.42966  |
| N...3...C... | -0.48873 | 0.30211  | 2.22132  | S2E0C...1-.. | 0.13317  | 0.10635  | 0.2638   | Nmax.7.....  | 0.02347  | 0.04176  | 2.30045  | n...2...c... | 0.40952  | 0.33272  | 0.10139  |
| N...=...(... | -0.85647 | -0.24181 | 0.01573  | S2E0C...10-. | 0.368    | 0.10243  | 0.31378  | Omax.0.....  | 0.35726  | 0.42531  | 0.02329  | n...c...(... | 0.08604  | -0.04637 | 0.06217  |

|              |         |         |          |              |          |          |         |             |          |          |          |              |          |          |         |
|--------------|---------|---------|----------|--------------|----------|----------|---------|-------------|----------|----------|----------|--------------|----------|----------|---------|
| N...=.....   | 3.03005 | 6.17479 | -0.64472 | S2E0C...2-.. | 0.08118  | 0.30835  | 0.02718 | Omax.1..... | -1.13545 | -0.53371 | 2.09431  | n...c.....   | 0.71129  | 0.28342  | 0.18897 |
| N...=...C... | 0.41696 | 0.48447 | -0.28322 | S2E0C...3-.. | 0.33097  | 0.00924  | 0.4594  | Omax.2..... | 0.10007  | 0.16523  | 0.12462  | n...c...2... | 0.17219  | -0.59589 | 0.39194 |
| N...C...#... | 0.08093 | 2.00605 | -2.37117 | S2E0C...4-.. | -0.73548 | -1.17562 | 0.18469 | Omax.3..... | 0.2999   | 0.02127  | 0.07819  | n...c...3... | -0.25666 | 0.47514  | 0.42112 |
| N...C...(... | 0.1207  | 0.282   | 0.22092  | S2E0C...5-.. | 2.03379  | 0.34411  | 0.42773 | Omax.4..... | 0.18116  | 0.00052  | -0.83168 | n...c...n... | 4.35072  | 6.97674  | 6.40472 |

Table S4. Score values (kcal/mol) for all computer-aided designed compounds

|     | Cofactor (VdW) | E-Inter (cofactor - ligand) | E-Inter (protein - ligand) | E-Inter total | Energy   | HBond    | NoHBond90 | Steric   | VdW      | MolDock Score | Rerank Score |
|-----|----------------|-----------------------------|----------------------------|---------------|----------|----------|-----------|----------|----------|---------------|--------------|
| A   | -1.63023       | -8.65188                    | -160.006                   | -168.658      | -165.027 | -1.2981  | -4.69246  | -158.708 | -25.6903 | -166.348      | -119.961     |
| HA1 | -0.554653      | -1.10049                    | -169.64                    | -170.74       | -177.189 | -2.37791 | -3.90548  | -167.346 | -9.03714 | -174.868      | -113.426     |
| HA2 | -0.459641      | -0.99038                    | -166.725                   | -167.715      | -174.735 | -3.97457 | -6.09645  | -162.75  | -42.7887 | -174.472      | -129.537     |
| HA3 | -2.53515       | -9.74414                    | -173.311                   | -183.055      | -188.183 | -2.7931  | -7.80976  | -170.518 | -38.9693 | -190.578      | -138.405     |
| HD1 | -2.42472       | -8.10204                    | -171.24                    | -179.342      | -181.596 | -9.08808 | -2.5      | -171.24  | -42.4677 | -179.718      | -136.979     |
| Hy1 | -2.3936        | -7.40262                    | -158.247                   | -165.649      | -167.376 | -2.5     | -5.17528  | -155.747 | -16.5851 | -166.866      | -113.824     |
| Hy2 | -1.43223       | -5.17812                    | -162.46                    | -167.639      | -168.229 | -1.30022 | -1.30022  | -161.16  | -50.7057 | -166.67       | -133.162     |
| Hy3 | -0.71222       | -8.98228                    | -169.17                    | -178.152      | -178.487 | -2.5     | -5        | -166.67  | -40.5211 | -177.445      | -134.945     |
| Hy4 | -2.33439       | -8.06146                    | -175.756                   | -183.818      | -184.916 | -1.70001 | -2.30071  | -175.756 | -45.774  | -184.374      | -141.41      |
| S1  | -1.84519       | -8.15288                    | -168.008                   | -176.16       | -172.086 | -2.46252 | -4.93173  | -165.545 | -44.395  | -170.422      | -133.922     |
| S2  | -2.39735       | -8.38029                    | -168.567                   | -176.947      | -177.72  | 0        | -2.5      | -168.567 | -42.4076 | -177.747      | -134.971     |
| S3  | -2.40127       | -8.03289                    | -170.661                   | -178.694      | -180.813 | 0        | -2.5      | -170.661 | -33.9678 | -179.852      | -131.712     |
| S4  | -2.50553       | -8.22988                    | -173.437                   | -181.667      | -183.942 | 0        | -2.5      | -173.437 | -42.0336 | -183.623      | -138.355     |
| S5  | -1.17601       | -4.95744                    | -161.186                   | -166.143      | -177.776 | 0        | -5.61107  | -159.486 | -20.8689 | -179.771      | -119.46      |
| S6  | -2.44434       | -8.14543                    | -172.615                   | -180.761      | -182.41  | 0        | -2.5      | -172.615 | -46.6343 | -182.114      | -139.897     |
| S7  | -1.99364       | -2.66602                    | -176.381                   | -179.047      | -186.972 | 0        | -11.4276  | -167.293 | -40.5561 | -186.674      | -135.995     |

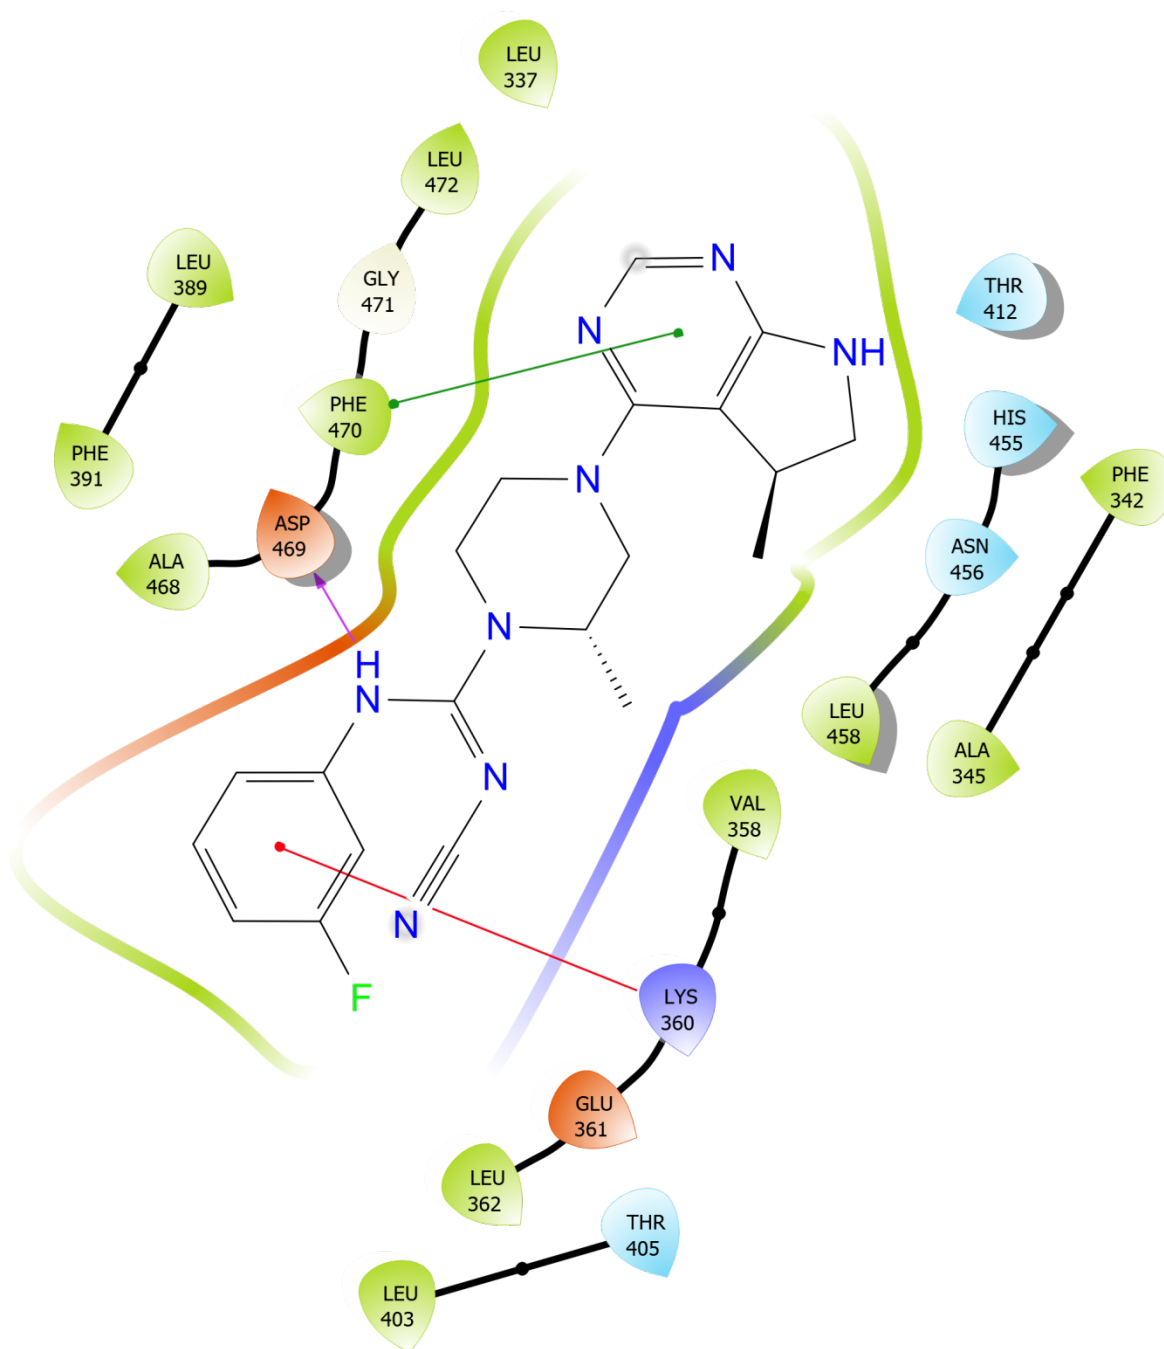

Figure S1. Two-dimensional representation of the interaction between molecule A and amino acids inside LIMK2 binding pocket.

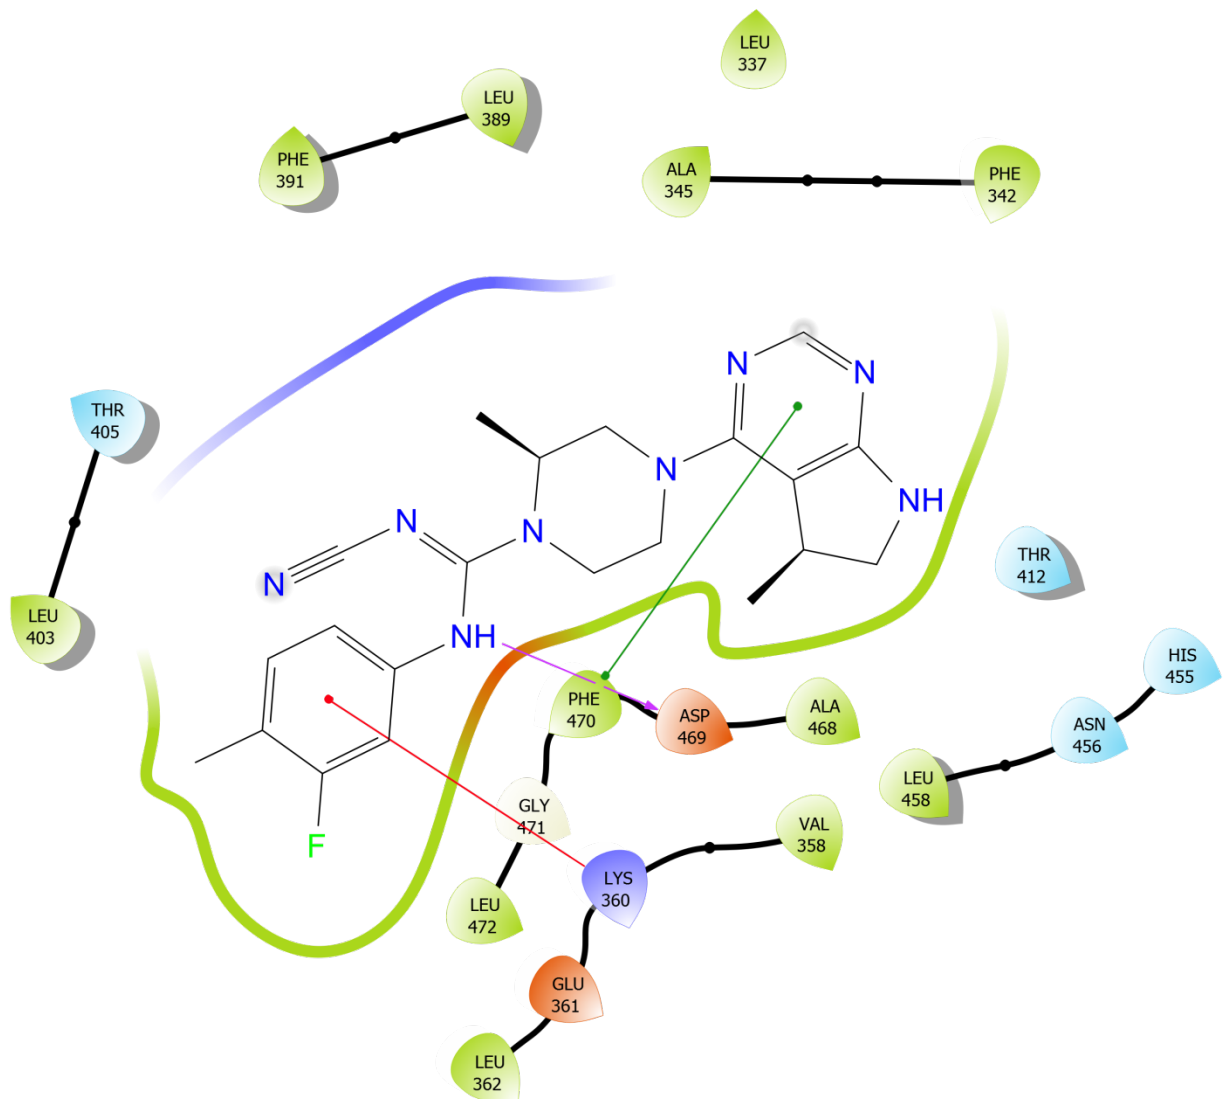

Figure S2. Two-dimensional representation of the interaction between molecule S1 and amino acids inside LIMK2 binding pocket.

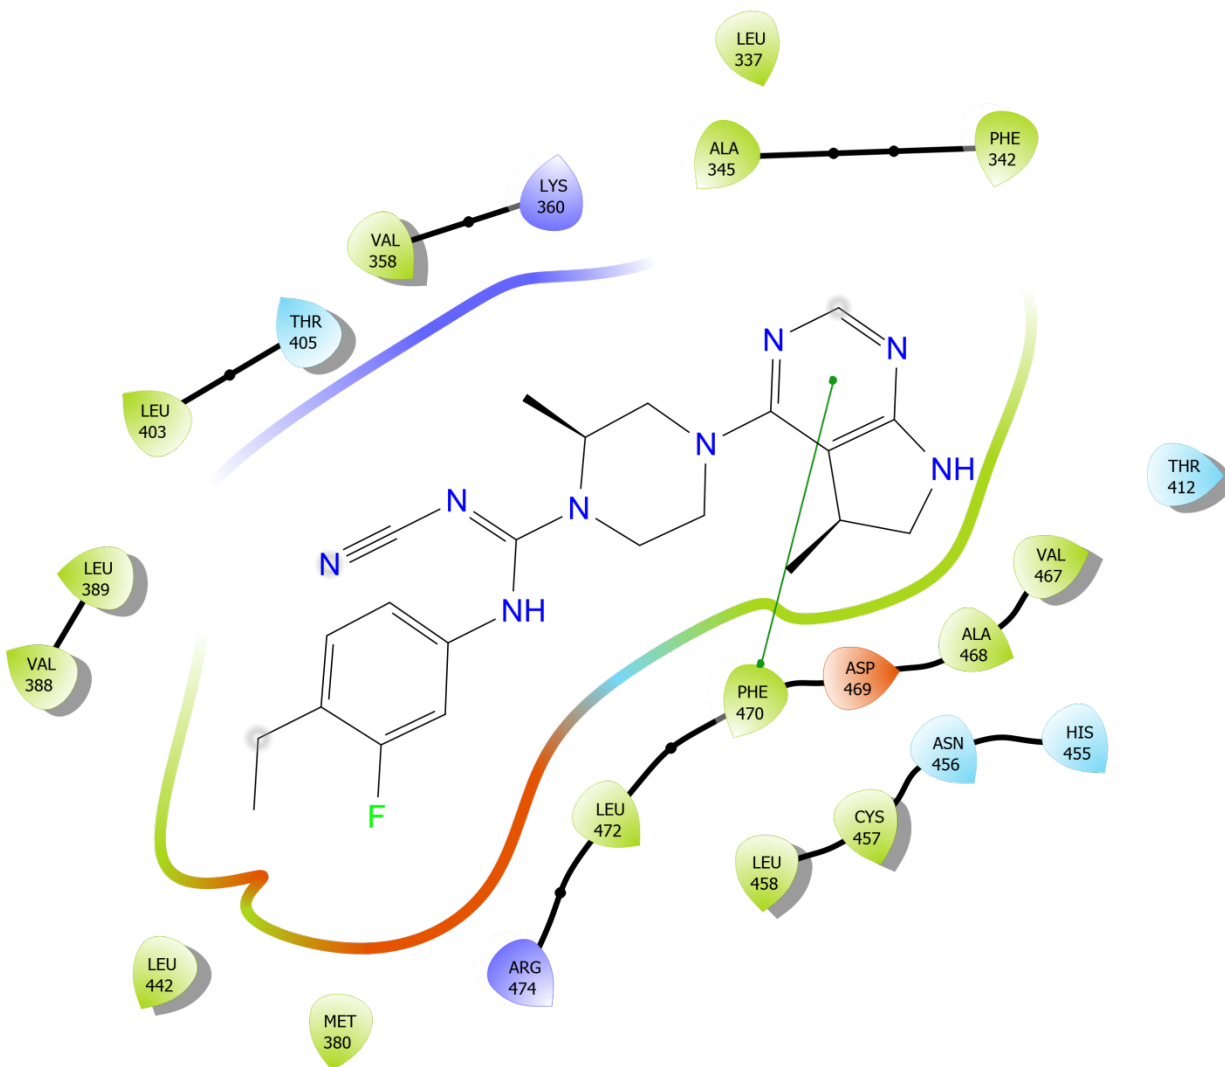

Figure S3. Two-dimensional representation of the interaction between molecule S2 and amino acids inside LIMK2 binding pocket.

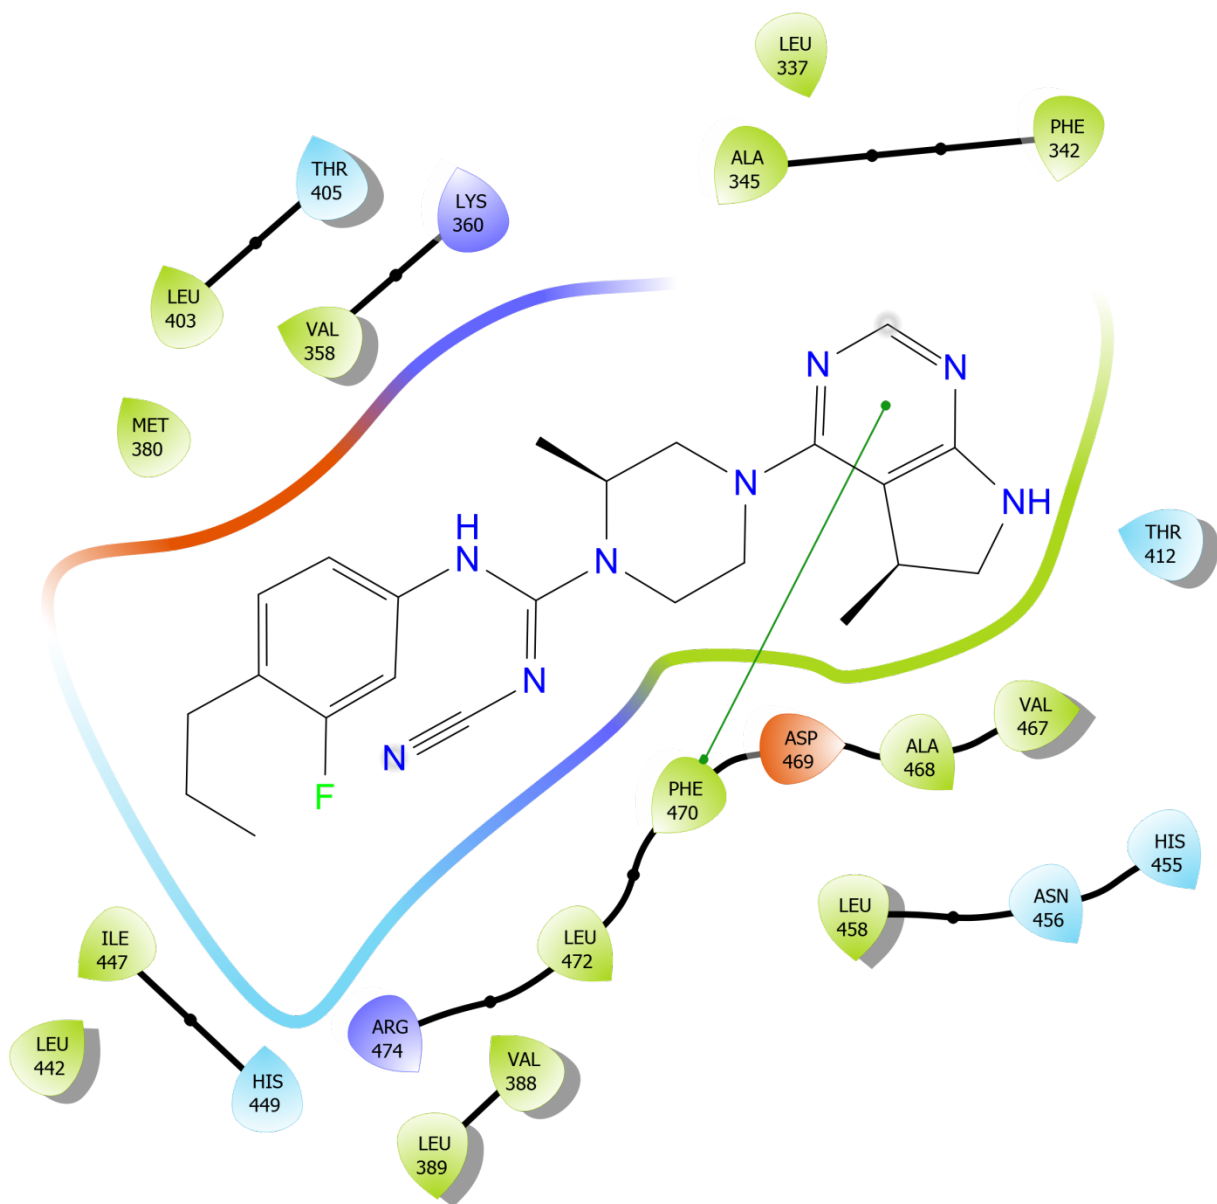

Figure S4. Two-dimensional representation of the interaction between molecule S3 and amino acids inside LIMK2 binding pocket.



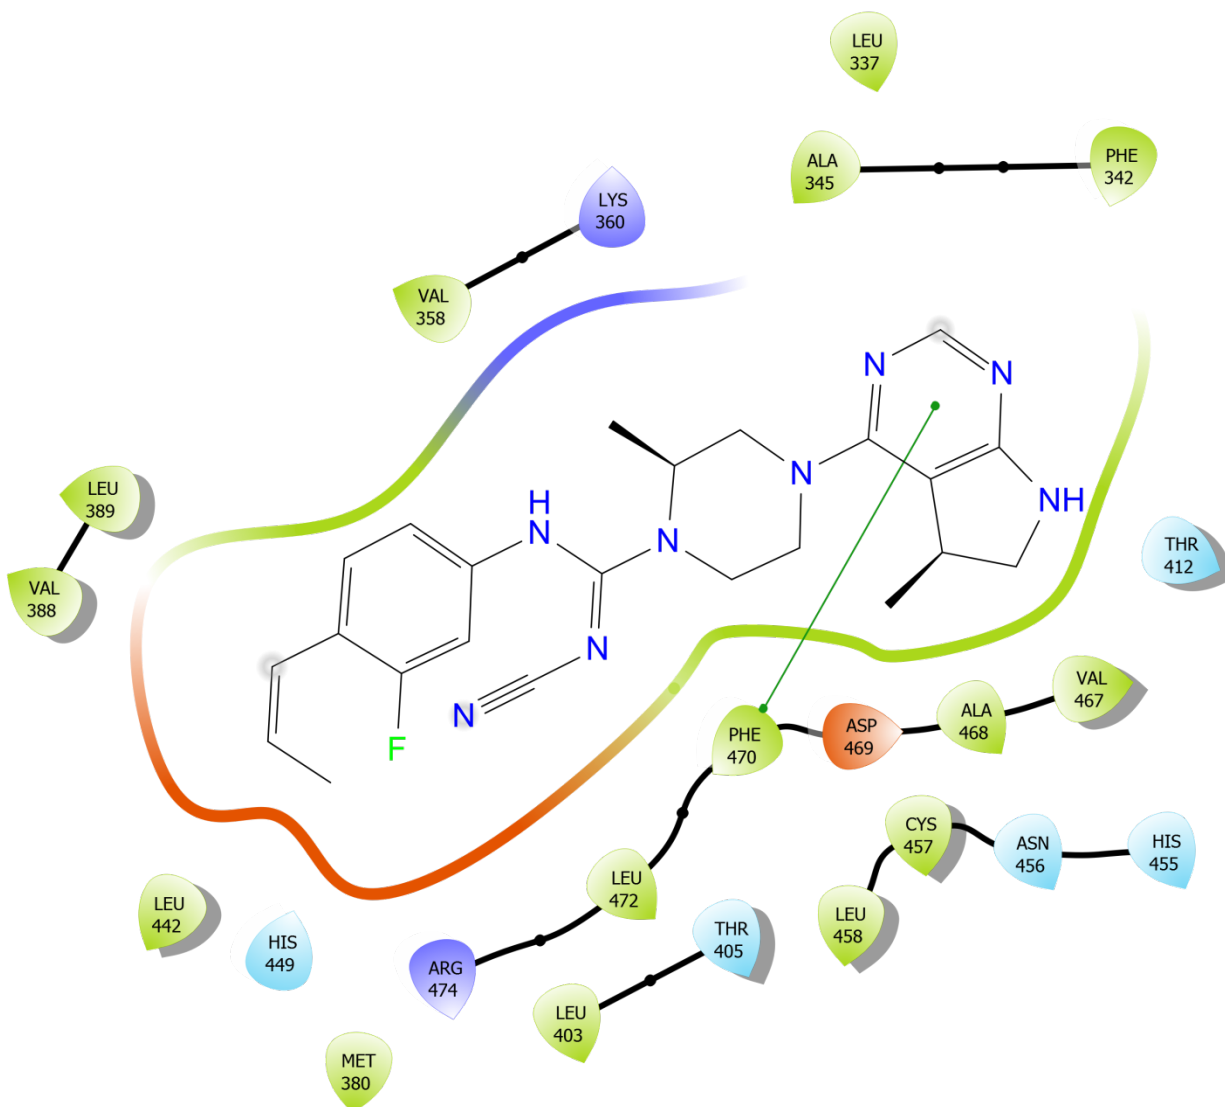

Figure S5. Two-dimensional representation of the interaction between molecule S4 and amino acids inside LIMK2 binding pocket.

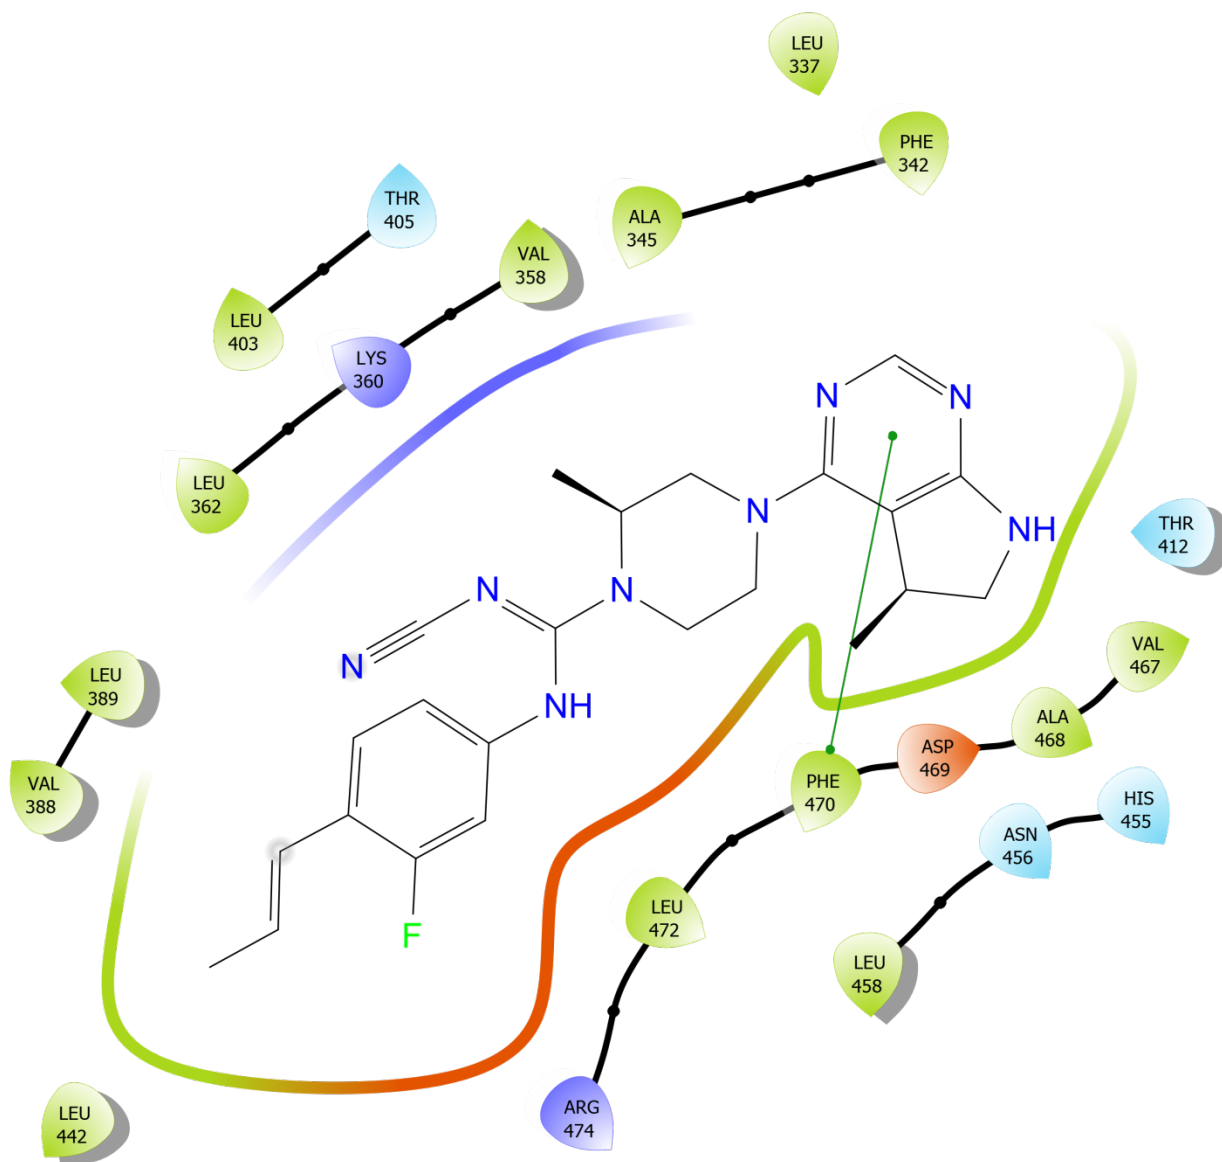

Figure S6. Two-dimensional representation of the interaction between molecule S5 and amino acids inside LIMK2 binding pocket.



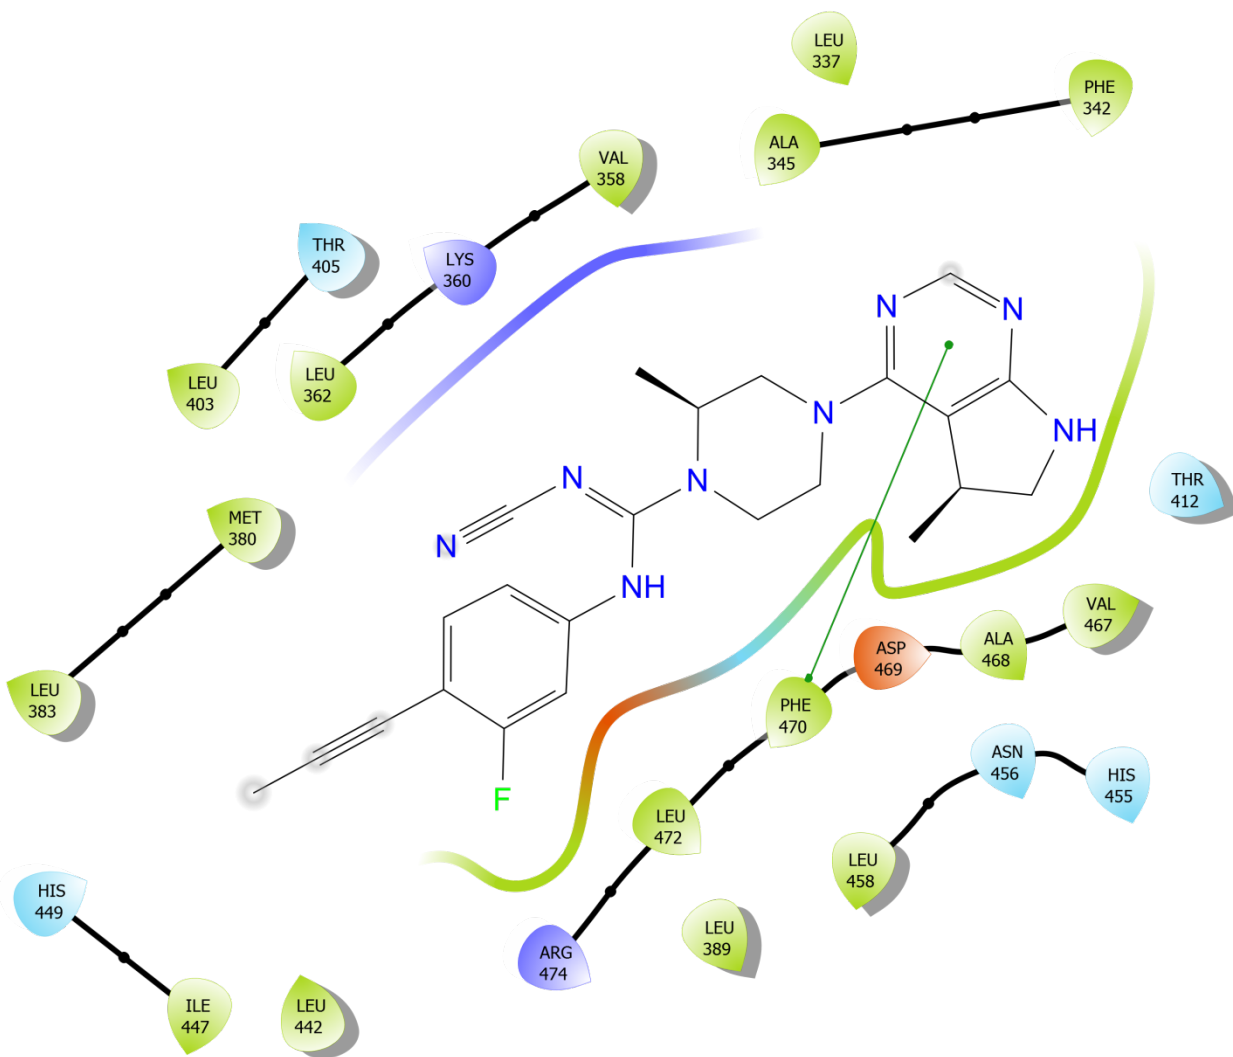

Figure S8. Two-dimensional representation of the interaction between molecule S7 and amino acids inside LIMK2 binding pocket.

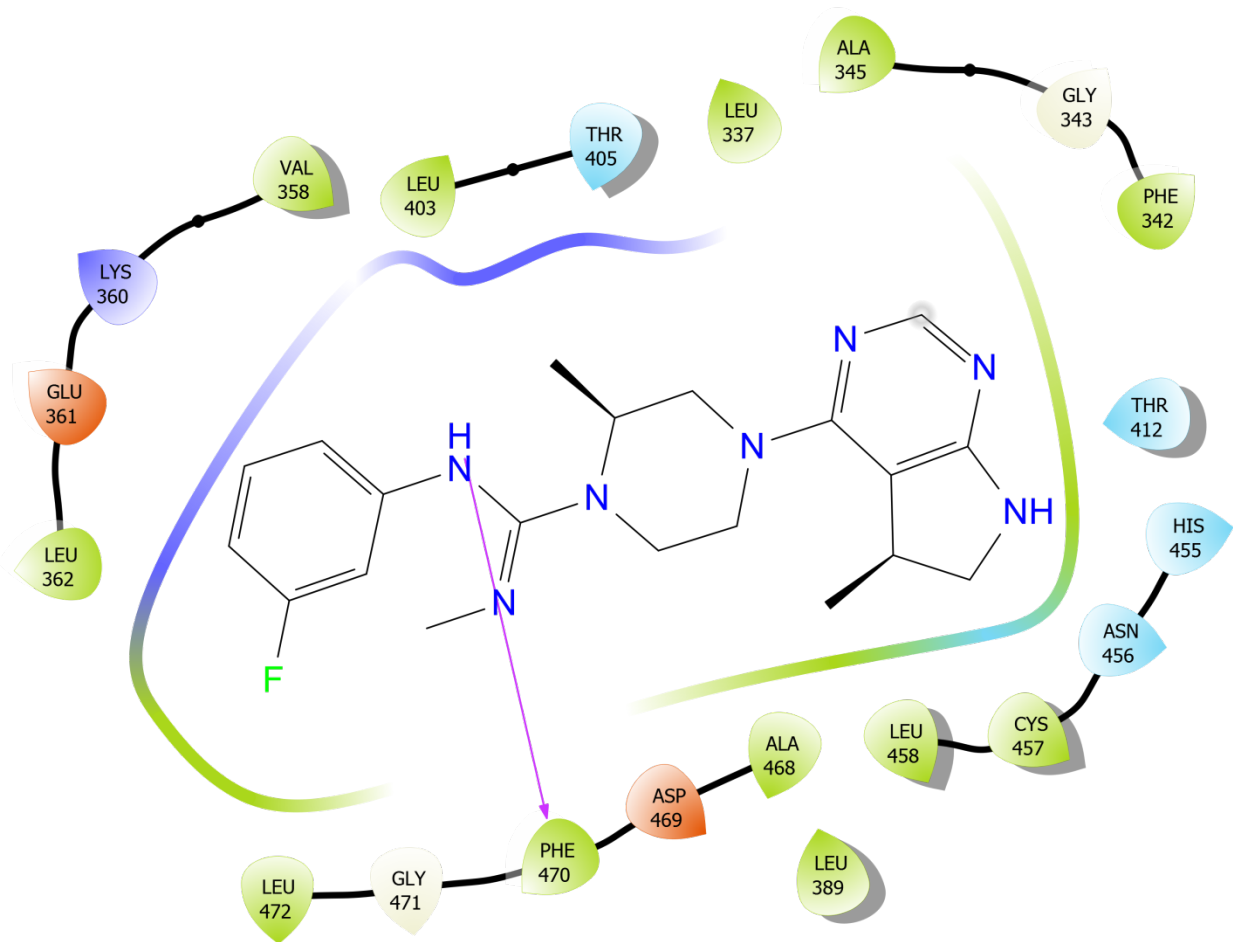

Figure S9. Two-dimensional representation of the interaction between molecule Hy1 and amino acids inside LIMK2 binding pocket.

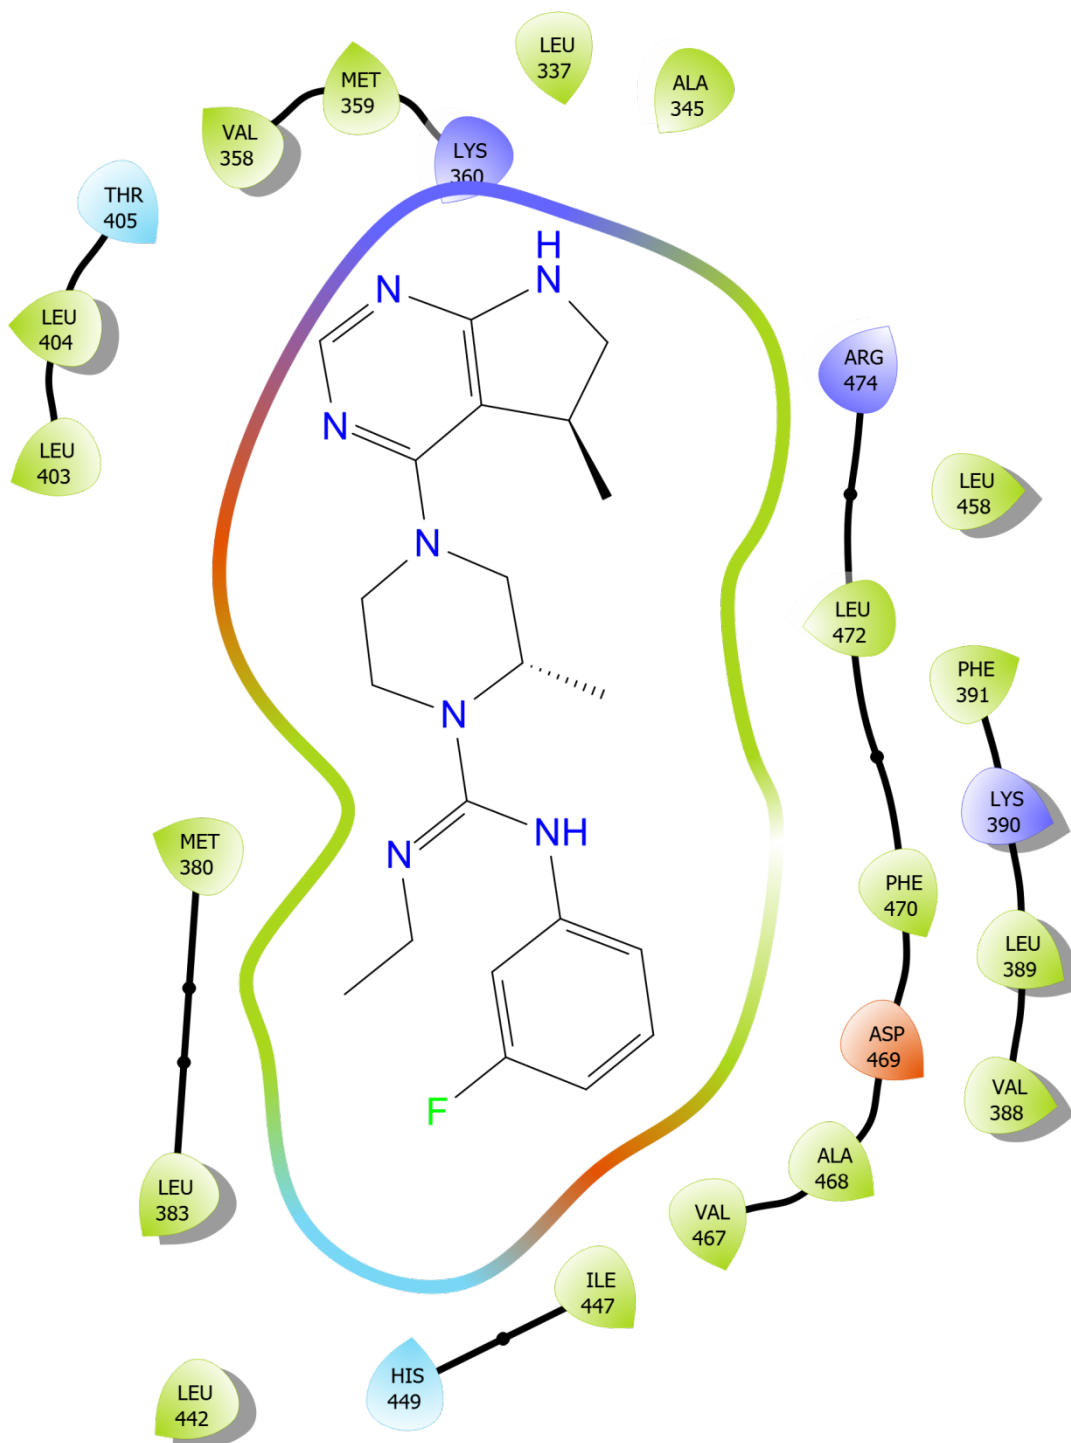

Figure S10. Two-dimensional representation of the interaction between molecule Hy2 and amino acids inside LIMK2 binding pocket.

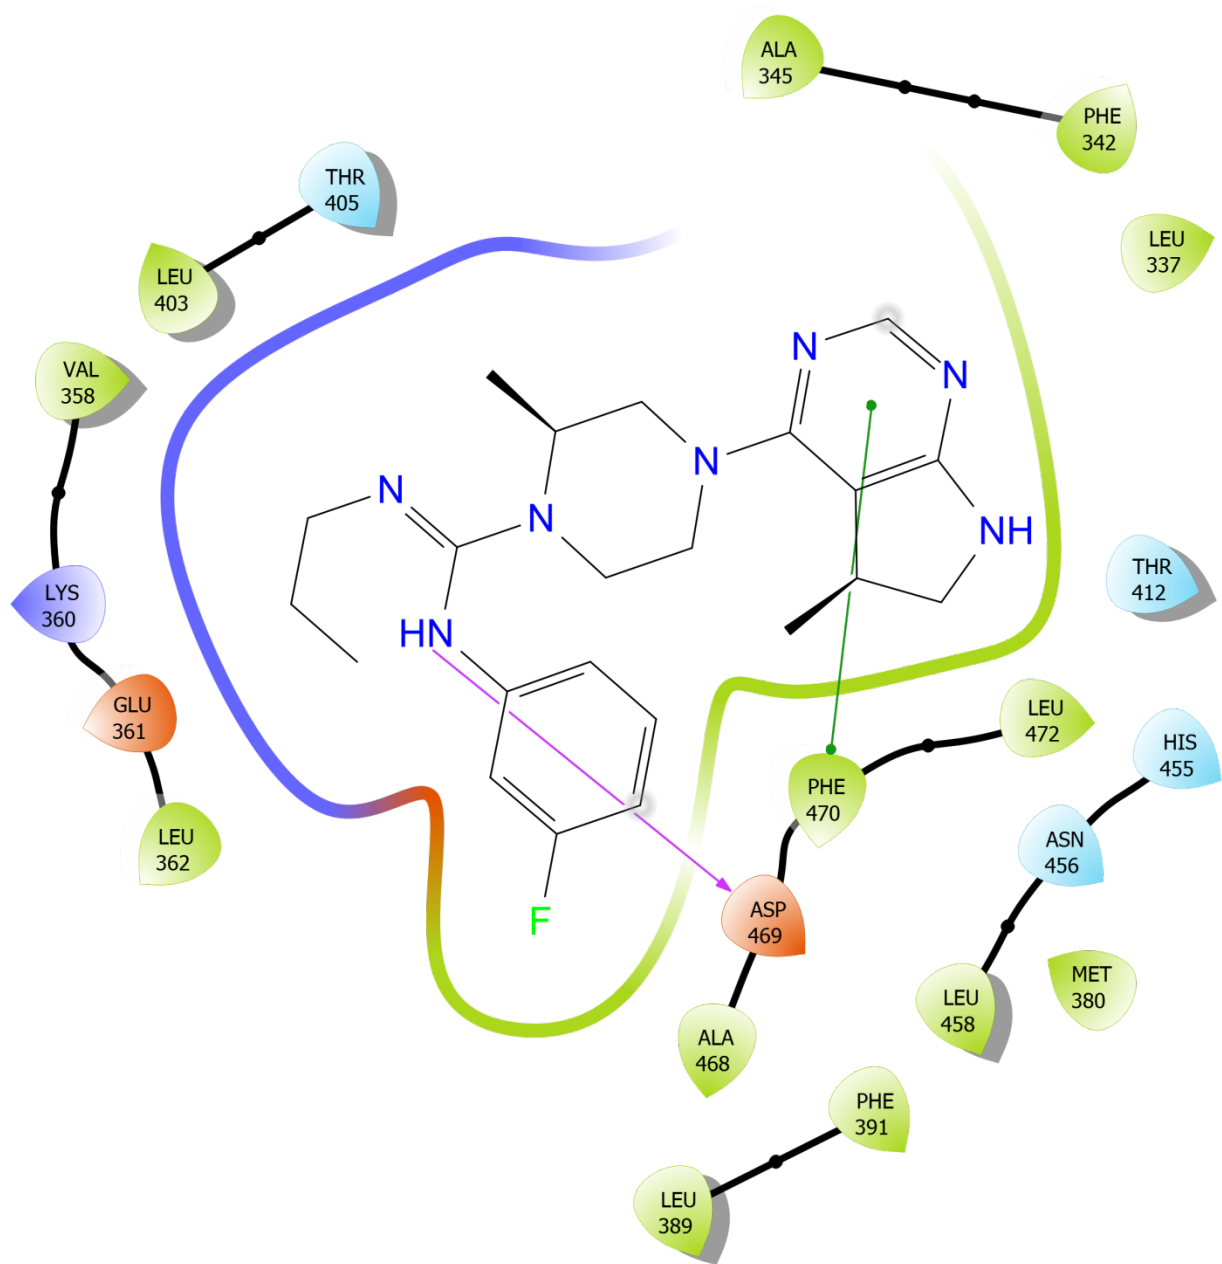

Figure S11. Two-dimensional representation of the interaction between molecule Hy3 and amino acids inside LIMK2 binding pocket.

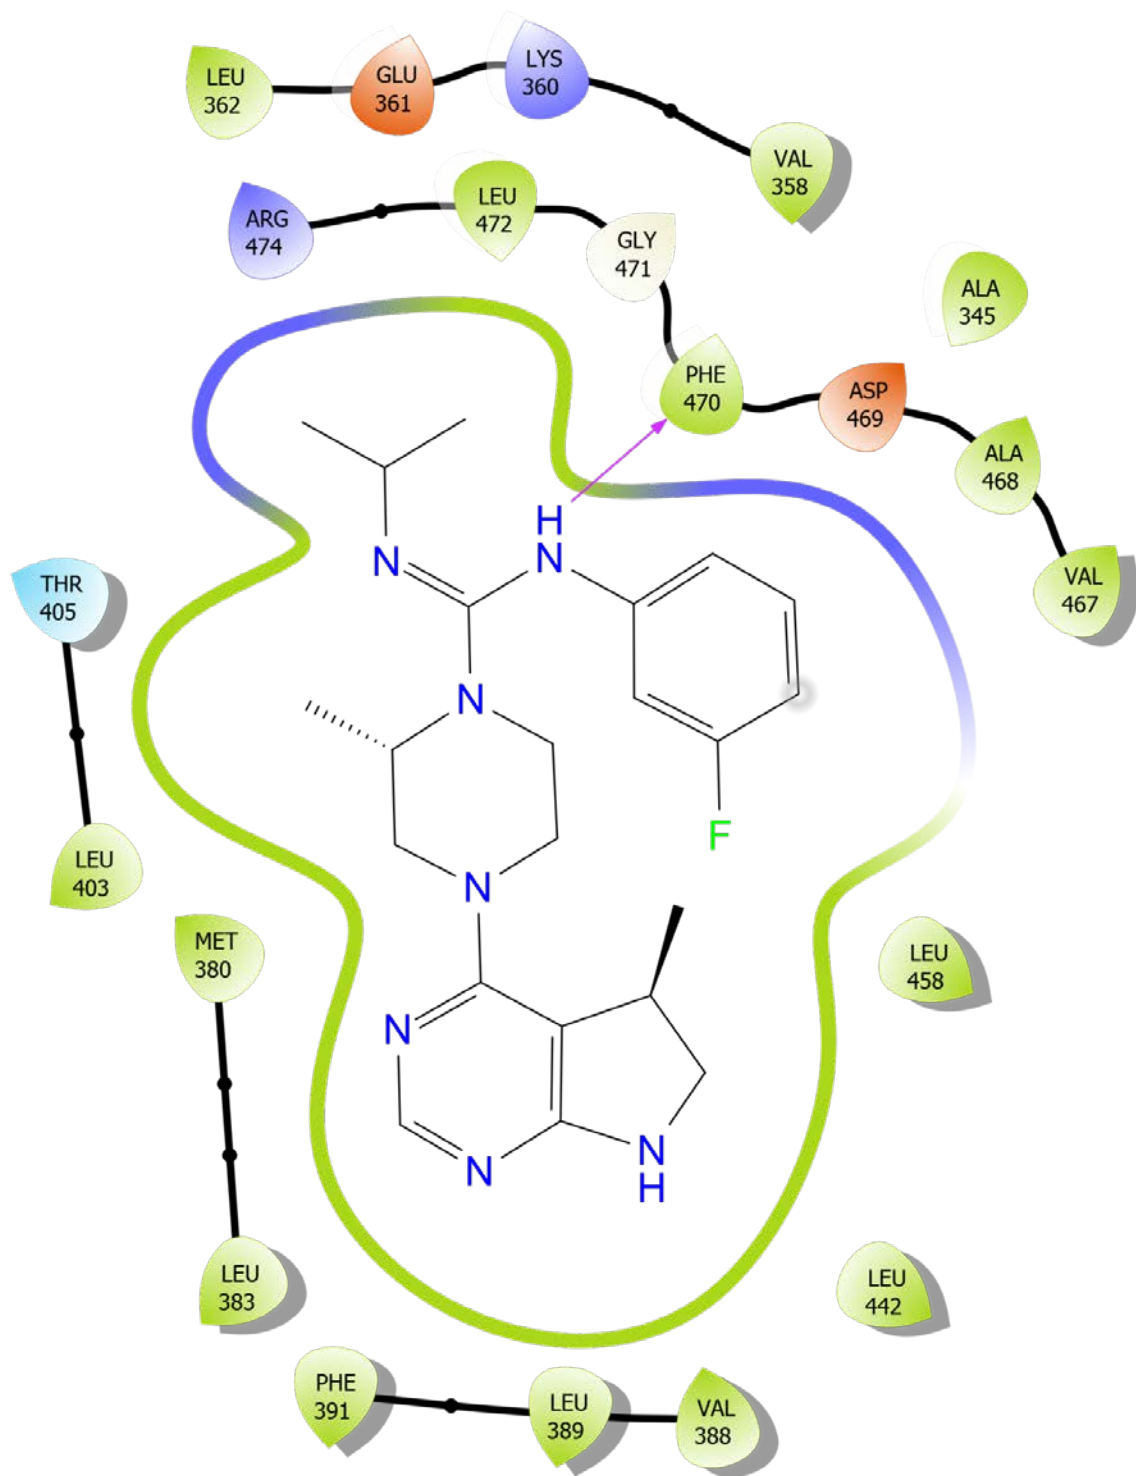

Figure S12. Two-dimensional representation of the interaction between molecule Hy4 and amino acids inside LIMK2 binding pocket.



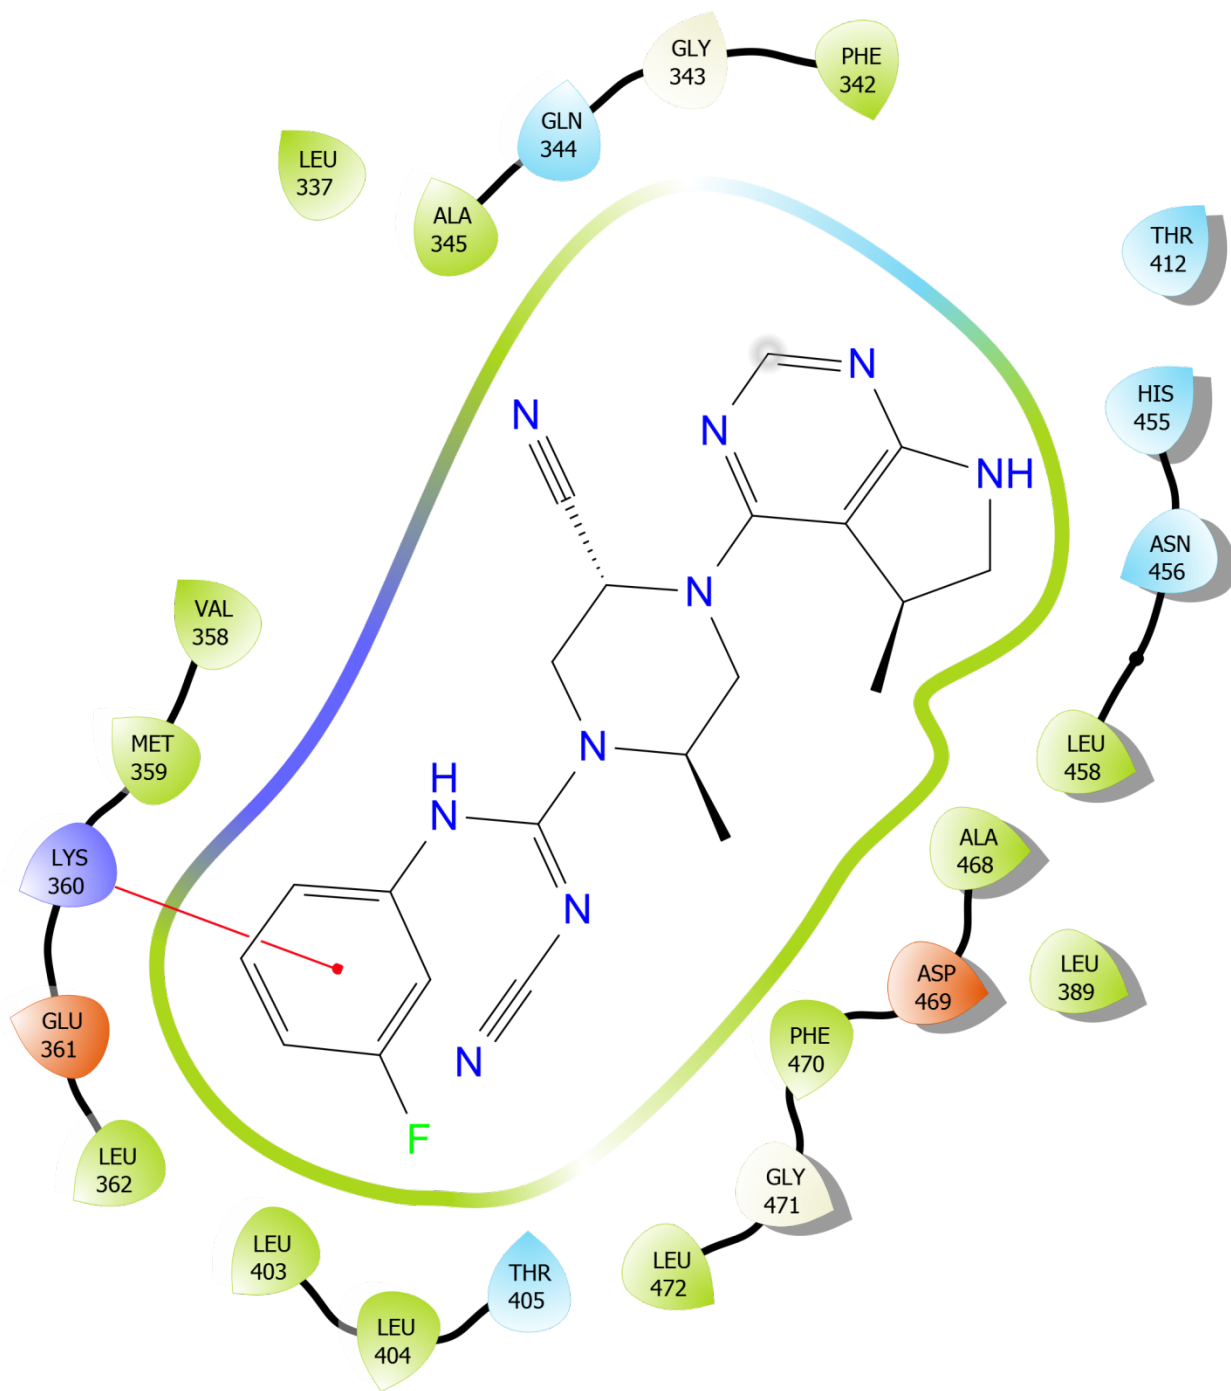

Figure S13. Two-dimensional representation of the interaction between molecule HA1 and amino acids inside LIMK2 binding pocket.

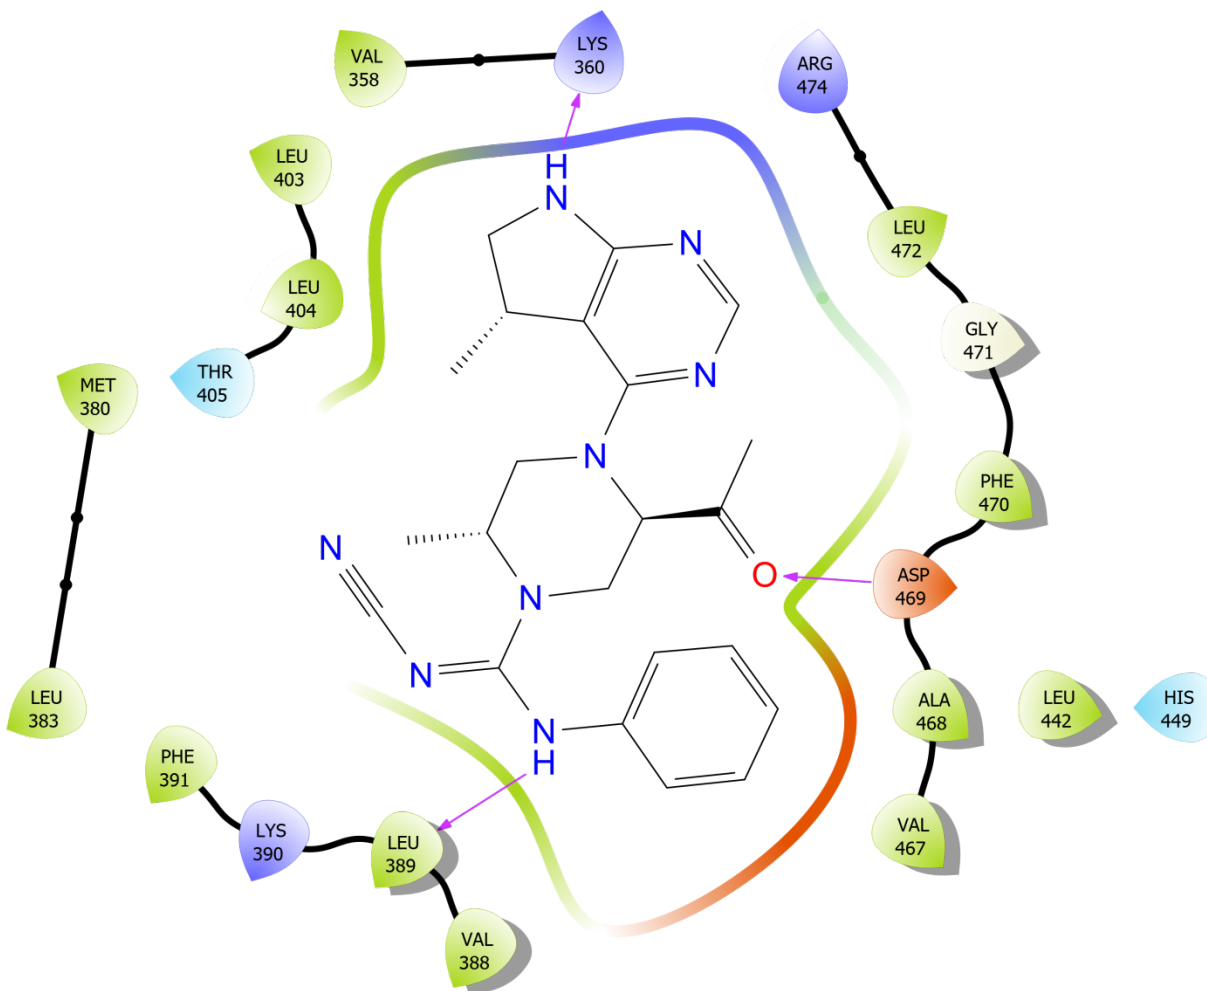

Figure S14. Two-dimensional representation of the interaction between molecule HA2 and amino acids inside LIMK2 binding pocket.

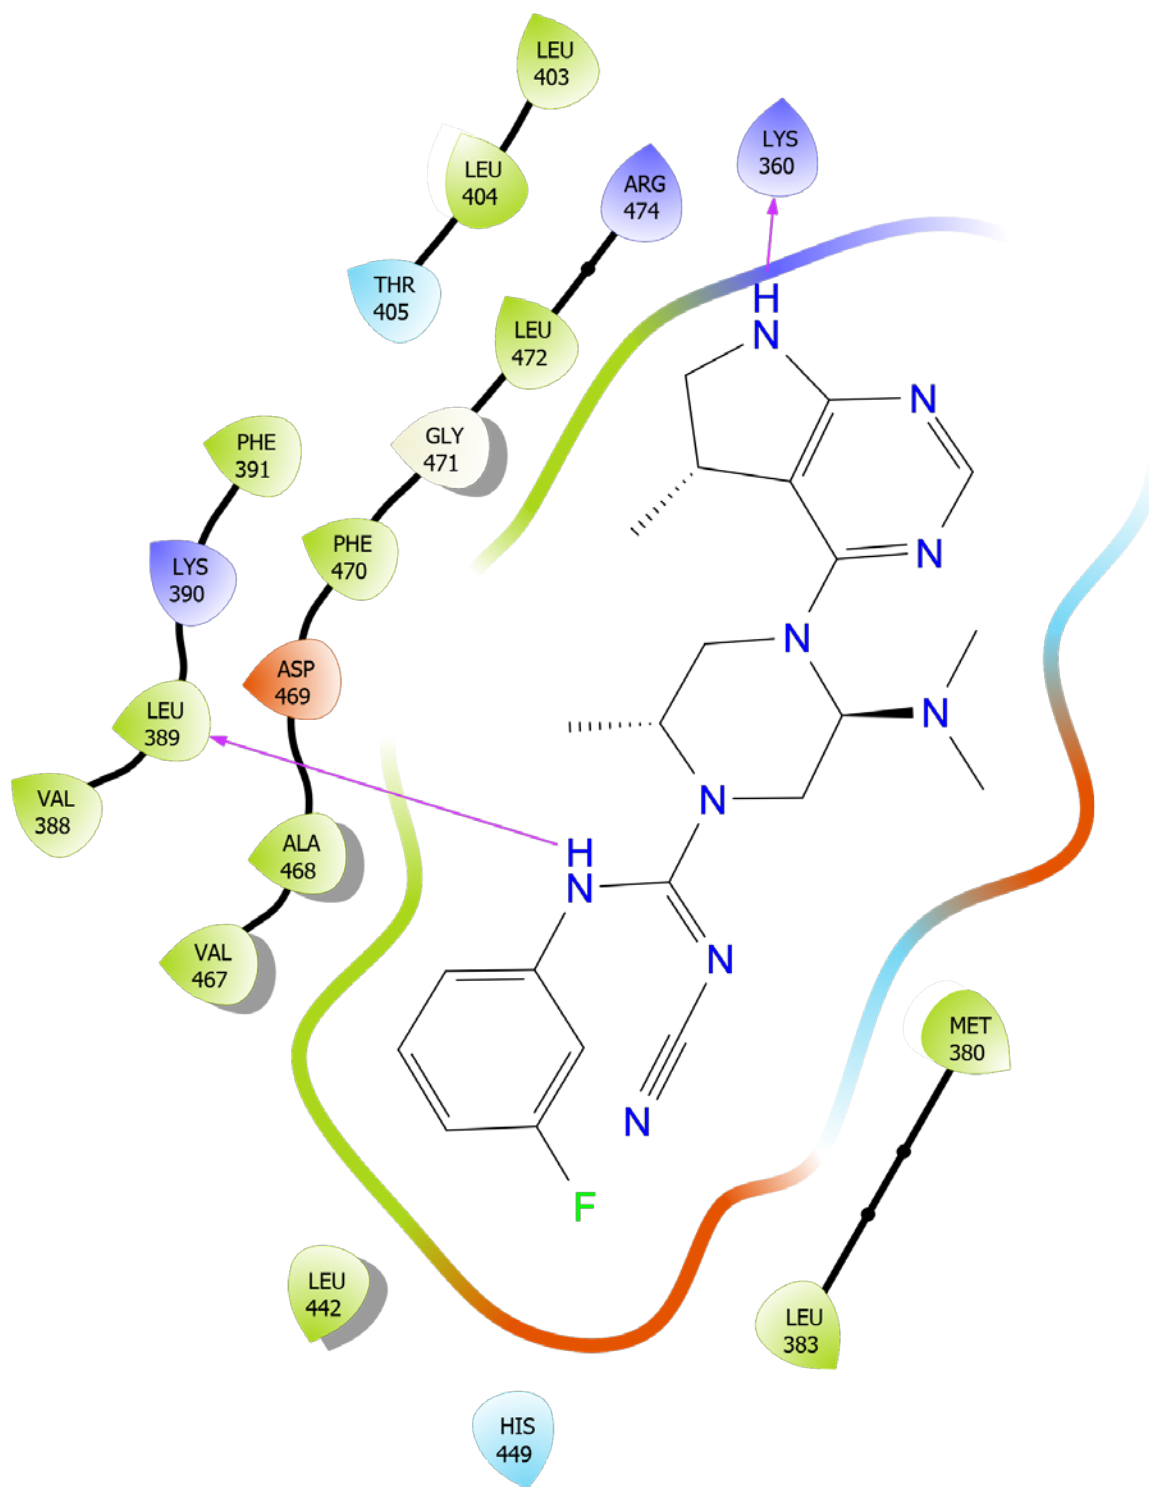

Figure S15. Two-dimensional representation of the interaction between molecule HA3 and amino acids inside LIMK2 binding pocket.

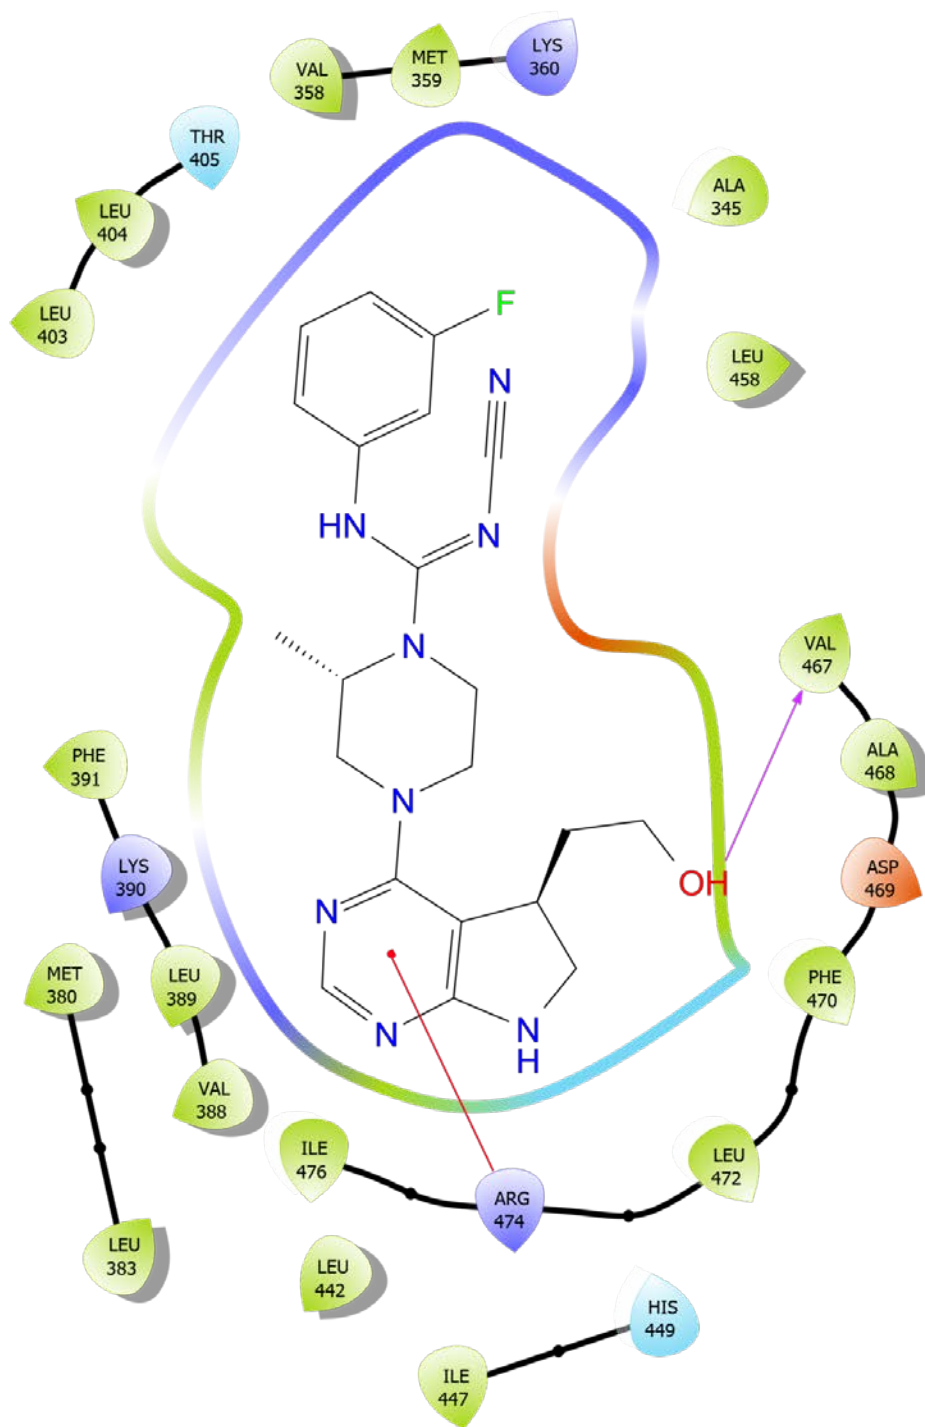

Figure S16. Two-dimensional representation of the interaction between molecule HD1 and amino acids inside LIMK2 binding pocket.
